1 **Ocular elongation and retraction in foveated reptiles**

2

3 Ashley M. Rasys<sup>1</sup>, Shana H. Pau<sup>2</sup>, Katherine E. Irwin<sup>1</sup>, Sherry Luo<sup>2</sup>, Paul A. Trainor<sup>3,4</sup>,  
4 Douglas B. Menke<sup>2</sup>, and James D. Lauderdale<sup>1,5</sup>

5

6 <sup>1</sup>Department of Cellular Biology, The University of Georgia, Athens, GA 30602, USA;

7 <sup>2</sup>Department of Genetics, The University of Georgia, Athens, GA 30602, USA; <sup>3</sup>Stowers

8 Institute for Medical Research, Kansas City, MO 64110 USA; <sup>4</sup>Department of Anatomy

9 & Cell Biology, The University of Kansas School of Medicine, Kansas City, KS 66160;

10 <sup>5</sup>Neuroscience Division of the Biomedical and Health Sciences Institute, The University  
11 of Georgia, Athens, GA 30602, USA

12

13 *Running title: Eye shape in lizard development*

14

15 *Key words: Anole, chameleon, lizard, eye, development, fovea, ocular morphogenesis,*  
16 *myopia*

17

18 *Corresponding author and person to whom request should be addressed:*

19 James D. Lauderdale

20 Department of Cellular Biology

21 University of Georgia

22 Athens, GA 30602, USA

23 Ph. 706-542-7433

24 Fax: 706-542-4271

25 e-mail: [jdlauder@uga.edu](mailto:jdlauder@uga.edu)

26

27 Douglas B. Menke

28 Department of Genetics

29 University of Georgia

30 Athens, GA 30602, USA

31 Ph. [706-542-9557](tel:706-542-9557)

32 Fax: [706-542-3910](tel:706-542-3910)

33 e-mail: [dmenke@uga.edu](mailto:dmenke@uga.edu)

34

35

36 *Funding:*

37 This work was funded by National Science Foundation awards 1149453 to D.B.M. and

38 1827647 to D.B.M. and J.D.L. and a Society for Developmental Biology Emerging

39 Models grant to A.M.R. A.M.R. was supported by NIH training grant T32GM007103 and

40 by an ARCS Foundation Scholarship. P.A.T is supported by the Stowers Institute for

41 Medical Research

42

43

44 **Disclosure Statement:** The authors have nothing to disclose. The funders of this

45 research had no role in study design, data collection and analysis, decision to publish,

46 or preparation of the manuscript.

1 **Abstract**

2 *Background:* Pronounced asymmetric changes in ocular globe size during eye  
3 development have been observed in a number of species ranging from humans to  
4 lizards. In contrast, largely symmetric changes in globe size have been described for  
5 other species such as rodents. We propose that asymmetric changes in the three-  
6 dimensional structure of the developing eye correlate with the types of retinal  
7 remodeling needed to produce areas of high photoreceptor density. As a test of this  
8 idea, we systematically examined three-dimensional aspects of globe size as a function  
9 of eye development in the bifoveated brown anole, *Anolis sagrei*.

10

11 *Results:* During embryonic development, the anole eye undergoes dynamic changes in  
12 ocular shape. Initially spherical, the eye elongates in the presumptive foveal regions of  
13 the retina and then proceeds through a period of retraction that returns the eye to its  
14 spherical shape. During this period of retraction, pit formation and photoreceptor cell  
15 packing are observed. We found a similar pattern of elongation and retraction  
16 associated with the single fovea of the veiled chameleon, *Chamaeleo calypttratus*.

17

18 *Conclusions:* These results, together with those reported for other foveated species,  
19 support the idea that areas of high photoreceptor packing occur in regions where the  
20 ocular globe asymmetrically elongates and retracts during development.

21

22

23

24 **Key Findings**

- 25
- 26 • The eyes of the brown anole, *Anolis sagrei*, and veiled chameleon, *Chamaeleo*  
27 *calypttratus* undergo dynamic asymmetrical changes in ocular shape during  
development.
  - 28 • In both species, asymmetric elongation and retraction of the ocular globe is  
29 associated with fovea morphogenesis.
  - 30 • Pit formation and photoreceptor cell packing in the foveal area occur when the  
31 corresponding region of the ocular globe is retracting relative to adjacent regions.

## 1 Introduction

2 Decades of experimental work have revealed a great deal about the developmental  
3 mechanisms that govern the patterning, differentiation, and growth of the vertebrate  
4 eye. Much of this understanding has come from functional studies in mouse, rat,  
5 chicken, *Xenopus*, zebrafish, and medaka.<sup>1,2</sup> Additional insights have come through  
6 genetic studies of human syndromes that feature eye defects.<sup>3</sup> Consequently, we know  
7 a great deal about the genes and signaling pathways that regulate development of the  
8 core structures common to all vertebrate eyes, including the cornea, lens and retina.<sup>4-7</sup>  
9 Missing from our current understanding of vertebrate eye development, however, is  
10 detailed knowledge about the developmental pathways that regulate the formation of  
11 specialized structures that are only present in the eyes of certain vertebrate species.  
12 These structures include the conus papillaris, areas or streaks, and foveae. Studies of  
13 eye formation in diverse vertebrate groups are needed to determine how these  
14 specialized structures form and to achieve a more complete understanding of vertebrate  
15 eye development and evolution. Notably, modern investigations of eye development  
16 have almost completely excluded reptiles, a tremendously successful amniote group  
17 represented by over 10,000 extant species.<sup>8</sup>

18 Although eye development in reptiles remains poorly studied, other aspects of  
19 reptilian biology have been actively explored. For instance, *Anolis*, a lizard genus with  
20 approximately 400 recognized species, has served as an important model system for  
21 studies of evolution, ecology, physiology, behavior, and neuroendocrinology for many  
22 years.<sup>9</sup> More recently, *Anolis* has also emerged as a system to investigate reptile  
23 development and the mechanisms that contribute to morphological evolution.<sup>10-16</sup> The  
24 brown anole lizard, *Anolis sagrei*, is particularly well-suited for developmental studies  
25 due its small size, ease of husbandry, continuous egg production, high fertility, and low  
26 cost. In addition, *ex ovo* culture systems and gene-editing have been established for  
27 this species, which presents the opportunity for pharmacological and genetic  
28 manipulation of *Anolis* embryos during development.<sup>12,17,18</sup> Of interest for studies of eye  
29 development, *Anolis* lizards possess specialized structures that include a bifoveated  
30 retina and a highly vascularized conus papillaris.<sup>19,20</sup>

1 Here we describe morphological and histological aspects of eye development in *A.*  
2 *sagrei*. We pay particular attention to alterations in ocular globe shape, which is an  
3 interesting, but poorly understood, aspect of eye development. Although typically only  
4 studied postnatally in the context of myopia in humans,<sup>21-23</sup> changes in ocular shape  
5 during embryonic development have been observed in a number of foveated species,  
6 including humans,<sup>24-30</sup> and non-human primates,<sup>26,31</sup> as well as geckos,<sup>32</sup> suggesting  
7 the presence of a conserved morphogenetic mechanism. The bifoveated brown anole is  
8 a good model system in which to study the mechanisms underlying fovea development  
9 in a vertebrate eye. In this study, we provide the first systematic three-dimensional  
10 assessment of the dynamic changes in ocular shape with an emphasis on ocular  
11 elongation and retraction and its association with fovea formation.

## 12 **Material and methods**

### 13 ***Animals***

14 All experimental procedures were conducted in accordance with the National  
15 Institutes of Health Guide for the Care and Use of Laboratory Animals under protocols  
16 approved and overseen by the University of Georgia (anoles) and Stowers Institute for  
17 Medical Research (chameleons) Institutional Animal Care and Use Committees. *Anolis*  
18 *sagrei* lizards were maintained in a breeding colony at the University of Georgia  
19 following guidelines described by *Sanger et al.*, 2008.<sup>33</sup> Eggs were collected weekly  
20 from natural matings and placed in 100 X 15 mm lidded petri dishes containing moist  
21 vermiculite and incubated at 27-28°C and 70% humidity. Adults and hatchlings were  
22 euthanized using methods consistent with the American Veterinary Medical Association  
23 (AVMA) Guidelines for the Euthanasia of Animals.<sup>34,35</sup> *Chamaeleo calytratus* were  
24 maintained in a breeding colony at the Stowers Institute for Medical Research (Kansas  
25 City, Missouri) following guidelines described by Diaz et al., 2015<sup>36</sup> and Diaz et al.,  
26 2019.<sup>37</sup> Eggs were collected at the time of oviposition and incubated at 26-28°C and  
27 50% humidity on damp vermiculite. Male and female embryos of both species were  
28 used for these studies.



## 1 **Staging**

2 Embryonic development of *Anolis* lizards typically takes place over a 30-33 day  
3 period, starting with fertilization, which takes place internally.<sup>38</sup> Early embryogenesis  
4 proceeds within the oviduct. *A. sagrei* embryos obtained from eggs that were collected  
5 after egg-laying were staged as described by Sanger et al., 2008.<sup>38</sup> Embryos younger  
6 than those captured by the Sanger staging series were denoted with the prefix “PL” for  
7 pre-laying followed by a number. We describe here 5 PL timepoints, which includes the  
8 first few embryos of the Sanger staging series (Sanger St 1-3 correspond to PL 3-5). PL  
9 stage embryos were collected from gravid adult females following euthanasia. *C.*  
10 *calypttratus* embryos were staged following criteria described by Diaz et al., 2017 and  
11 Diaz et al., 2019 and stage matched to the anole using Sanger’s morphological  
12 criteria.<sup>37-39</sup>

## 13 **Dissection**

14 Lizard embryos were removed from their shells using a blunt pair of forceps and iris  
15 scissors in 1x phosphate-buffered saline (PBS; 137 mM NaCl, 2.7 mM KCl, 10 mM  
16 Na<sub>2</sub>HPO<sub>4</sub>, 1.8 mM KH<sub>2</sub>PO<sub>4</sub>, pH 7.4). Upon removal of yolk and amniotic sac with fine  
17 forceps, embryos were placed into 60 ml of fresh 1x PBS solution with 1 ml of 0.4%  
18 pharmaceutical grade, neutrally buffered tricaine (TRICAINES; Western Chemical Inc)  
19 to anesthetize for imaging. Eyes were enucleated from embryo stages >4 with fine  
20 forceps and placed in Bouin’s fixative at 4°C overnight on a rocker. Following fixation,  
21 eyes were washed five times at 15 min per wash in 1x PBS. Specimens were stored in  
22 70% ethanol solution (EtOH) at 4°C until processed for histology. Whole chameleon  
23 embryos were dissected from eggs in a similar manner, fixed in Bouin’s at 4°C  
24 overnight, washed in 1x PBS, and stored in 70% EtOH prior to shipment from the  
25 Stowers Institute for Medical Research. Upon arrival at the University of Georgia,  
26 embryos were slowly rehydrated in a series of graded EtOH/PBS solutions. Once fully  
27 rehydrated, eyes were carefully removed from embryos.

## 28 **Whole Eye Measurements**

29 Prior to fixing, anole eyes were positioned in both a lateral and dorsal orientation and  
30 imaged with a ZEISS Discovery V12 SteREO microscope and AxioCam while in 1x PBS

1 solution. AxioVision 4 software (Carl Zeiss MicroImaging) was used to take axial  
2 measurements along the dorsoventral (y), nasotemporal (x), and lateromedial (z)  
3 aspects of imaged eyes from embryos at Sanger stages 4-18, the hatchling (Hch), and  
4 the adult (Adt). The lateral view, which encompassed the whole cornea, was used to  
5 measure the y- and x-axes, whereas the dorsal view was imaged to obtain x- and z-  
6 axes. Because x-axial measurements can be acquired from both views, we included  
7 only the dorsal x-axial value in our dataset and used the other value as a control for  
8 proper orientation. Measurements from eyes that were not correctly positioned were  
9 excluded from the dataset. We normalized the x- and z-axial measurements from each  
10 lizard to that same individual's y-axis and then multiplied this number to the mean ( $\mu$ ) of  
11 that individual's stage group y-axis ( $\mu_y$ ),  $\frac{x \text{ or } z}{y} * \mu_y = x\text{- or }z\text{-axis}_N$ . To identify trends in  
12 ocular growth, a ratio was then calculated for each axis by taking the raw y-axis dataset  
13 and the normalized datasets (x- and z-axis<sub>N</sub>) from every lizard and dividing these values  
14 with the corresponding  $\mu$  of the raw y-, x-, and z-axial lengths of the hatchling,  
15  $\frac{y\text{-axis, } x\text{-axis}_N, \text{ or } z\text{-axis}_N (\text{St } 4\text{-}18; \text{Hch}; \text{Adt})}{\mu_y, \mu_x, \text{ or } \mu_z (\text{Hch})}$ . Chameleon eyes were processed as reported  
16 above except imaging was performed post-fixation and rehydration. Prism 7 (GraphPad  
17 Software) and JMP V14.1 (JMP SAS) were used for graph generation and data  
18 analyses. As a few of the sample groups did not have a normal distribution, we used a  
19 nonparametric one-way ANOVA (Kruskal-Wallis) and Mann-Whitney for our statistical  
20 analyses.

### 21 **Paraffin Sectioning**

22 Eyes were dehydrated in a series of graded ethanol solutions 70%, 80%, 90%, 96%  
23 and 100% (twice) for a minimum of 15 min each and then soaked in xylene for a total of  
24 30 min for all embryonic stages. Tissue specimens were incubated in a series of 3  
25 paraffin wax jars for 30 min at 65°C, embedded in paraffin, and serially sectioned  
26 horizontally at 10  $\mu$ m. In adult specimens, the dorsal aspect of the eye was punctured  
27 with a 0.15 mm minutien pin prior to processing in xylenes and paraffin waxes to  
28 facilitate wax entry. Processing time in xylene in the adult was extended up to a total of  
29 2 hrs. Eyes were serial sectioned on a horizontal plane. Sections were stained with  
30 hematoxylin & eosin following standard protocols and mounted in Cytoseal (Thermo

1 Scientific™ Richard-Allan Scientific™). Photomosaic images were generated using a  
2 KEYENCE BZ-700 microscope with Keyence image stitching software. Adobe  
3 Photoshop CC (2017.01 release) was used to digitally enhance contrast and adjust  
4 white balance of images.

5

## 6 **Results**

### 7 ***Anatomy of the adult anole eye***

8 Laterally positioned in the skull, the adult eye externally is oblate spheroid in shape  
9 with a prominent convex cornea slightly biased toward the nasal region (Figure 1a,b).  
10 Peripheral to the cornea is the sclera sulcus, whose curvature is supported by 14 sclera  
11 ossicles (Figure 1b,c). The sclera ossicles are uniformly orientated in a patterned ring  
12 except for a slight extension in the temporal region of the eye (Figure 1c). The anole's  
13 radial pupil is positioned centrally, fashioned by a heavily pigmented iris with an array of  
14 iridophores and melanophores that extend into the circumferential sclera sulcus (Figure  
15 1b,c). The iris is asymmetric with dorsal and ventral notches defining the boundary  
16 between the larger temporal and smaller nasal region (Figure 1c, arrowheads). Dorsally,  
17 a protruding blood vessel is present that extends from the optic nerve, wraps around the  
18 region of the center fovea (a small bulge in the medial region), and dissipates towards  
19 the dorsal nasal area of the eye (Figure 1b, narrow arrowheads). The optic nerve (not  
20 shown) exits the eye ventrally and temporally to the central fovea.

21 Internally, the adult anole eye is very similar to other vertebrates, possessing a  
22 cornea, iris/ciliary body, lens, and retina (Figure 2a). Anteriorly, the transparent cornea,  
23 which is exterior to the lens and iris, is composed of epithelial, stromal, and endothelial  
24 layers (Figure 2a, Rasys et al., *in prep*). These layers thicken towards the limbal area  
25 where the cornea and anterior margin of the sclera ossicles meet. The sclera ossicles  
26 extend from the limbal area outward towards the sclera proper in overlapping sheets  
27 making up the sclera sulcus. Underlying this sclera sulcus is the long thin ciliary body  
28 (Figure 2a). The ciliary body lacks a ciliary process and comprises an inner non-  
29 pigmented layer and an outer pigmented epithelial layer (Rasys et al., *in prep*). These  
30 layers extend from the neural retina to the iris-ciliary boundary. Beyond this boundary is  
31 the iris proper which is closely associated with the lens (Figure 2a). Both the inner and

1 outer iris epithelium are pigmented. The lens is oval shaped with a central nucleus,  
2 inner cortex, and outer annular pad (Figure 2a). Anchoring the lens are zonular fibers  
3 that extend from the ciliary inner non-pigmented epithelium (Figure 2a). Posteriorly, the  
4 eye includes the retina, retinal pigmented epithelium, choroidal, and sclera layers. The  
5 neural retina is avascular and composed of a ganglion cell layer (GCL), inner and outer  
6 plexiform layers (IPL and OPL), inner and outer nuclear layers (INL and ONL) (Figure  
7 2b,c).

8 Each eye has two foveae with one in the central retina and a second in the temporal  
9 retina (Figure 2). The central fovea, located slightly temporal to the optical axis, exhibits  
10 a distinct pit accompanied by a higher density of photoreceptor cells compared to the  
11 peripheral retina, as has been previously described for other anoles.<sup>19,20</sup> The retina at  
12 the central foveola is devoid of the GCL, INL and ONL (Figure 2a,c). The retina in the  
13 parafoveal region has a larger number of cell bodies in the INL and ONL compared to  
14 the peripheral retina (Figure 2a,c). A second, shallower fovea is located in the temporal  
15 retina roughly 45-50 degrees from the central fovea (Figure 2). This temporal fovea  
16 exhibits a shallow pit accompanied by an increase in photoreceptor cell density. At its  
17 center, all the retinal cell layers are retained, but layers are thinner than the surrounding  
18 peripheral retina (Figure 2b). The temporal fovea is approximately one-third the area of  
19 the central fovea, with fewer photoreceptor cells.

## 20 ***Eye formation***

21 In anoles, fertilization takes place internally and embryonic development occurs over  
22 a 30-33 day period.<sup>38</sup> As a consequence, the earliest stages of eye development take  
23 place while the eggs are in the oviduct. Embryonic stages pre-egg lay are denoted with  
24 the prefix "PL". Stages post-egg lay use the Sanger staging series<sup>38</sup> and are denoted  
25 using the prefix "St". Stages PL 3-5 correspond to Sanger stages St 1-3.<sup>38</sup> For these  
26 earliest timepoints we use the PL nomenclature to help distinguish pre-lay stages (PL 1-  
27 5) from post-lay stages (Sanger St 4-19).

28 The initial stages of eye development occur between PL 1 and PL 5. Optic vesicle  
29 formation is evident in embryos at PL 1 (Figure 3a), which is about 1 day after  
30 fertilization and 3 days before egg lay. The lens placode is visible at PL 2 (see  
31 developmental poster in supplementary data). By PL 3, the optic cup and lens pit are

1 present (Figure 3b). Rapidly following this period, the cornea separates (PL 5) from the  
2 newly minted lens vesicle (PL 4) and the optic fissure begins to close (PL 5)  
3 (developmental poster). At the time of egg lay (~St 4), the anole eye is spherical, trace  
4 amounts of pigmentation are evident in the temporal region of the eye (Figure 3c) and  
5 present nasally by St 5 (Figure 3d). At this time (St 5), the prospective central and  
6 temporal foveal regions are evident as thickenings in the retina, also defined as retinal  
7 mounding (Figure 3g, *Rasys et. al.*, in prep). St 5 also marks the first appearance of the  
8 sclera sulcus, evidenced by a slight depression in the temporal area, which extends to  
9 the nasal side by St 6 (Figure 3d). Eventually, the sclera sulcus forms a complete ring  
10 encircling the cornea (developmental poster, *whole eye stages 6-8*). Shortly following  
11 this period, pigment begins to increase - initially in the iris between St 6-10 and then  
12 throughout the rest of the eye. In the iris, pigment is deposited first as a narrow band  
13 along the horizontal axis (St 6-7) before radiating outward throughout the dorsal and  
14 ventral regions (St 8-9) (Poster, *Whole eye*). By St 10, pigment in the iris is black and  
15 evenly distributed. Granules are also just becoming obvious throughout the whole eye,  
16 but more so in the temporal region. At St 13, retinal mounding is no longer present in  
17 the central and reduced in the temporal foveal regions (Figure 3h). The eye is a light  
18 brown color which darkens between St 15-17 and is completely black by the time of  
19 hatching (Figure 4b; developmental poster). During this period the sclera ossicles that  
20 shape the sulcus and provide support to the underlying ocular structures, are starting to  
21 form. The sclera anlagen first manifests as a ring of pale conjunctiva papillae around the  
22 cornea between St 11-12. By St 13, scleral sheets are present although they are small  
23 and by St 15-16 these expand, radiating outward and eventually overlapping (St 17)  
24 with the neighboring plates (developmental poster). Iridophores (reflective pigments)  
25 scattered throughout the iris and sclera sulcus region, are also apparent during this  
26 time.

## 27 ***Eye morphogenesis***

28 The anole eye exhibits conspicuous asymmetric changes in morphology during  
29 development (Fig 4). To assess potentially complex changes in the three-dimensional  
30 shape of the globe, measurements were made along the three anatomical axes of the  
31 eye at different stages of development. For this study, the dorsoventral axis was defined

1 as the y-axis, the nasotemporal axis was defined as the x-axis, and the lateromedial  
2 axis was defined as the z-axis (Figure 4a). The lateromedial (z) axis is also the optical  
3 axis and passes through anterior (iris and lens) and posterior (retina) structures of the  
4 eye.

5 At St 5, the ocular globe is mostly spherical in shape (Figure 4b), with similar lengths  
6 along the three anatomical axes. At late mid-gestation (St 13-14), the ocular globe has a  
7 triangular appearance with increased lengths along the nasotemporal (x) and  
8 lateromedial (z) axes compared to the length of the dorsoventral axis (Figure 3e,h;  
9 Figure 4b). Interestingly, whereas the nasal surface of the globe has a rounded  
10 appearance, both the temporal and medial surfaces have angular shapes. These  
11 differences in surface geometry suggest that elongation in the nasotemporal and  
12 lateromedial planes occurred largely by changes in the temporal and medial regions of  
13 the globe, respectively. The medial region of the globe corresponds to the area of the  
14 retina that gives rise to the central fovea, and the temporal region corresponds to that of  
15 the temporal fovea (Figure 3g-i). The eye at this stage also exhibits considerably less  
16 pigmentation at the medial surface compared to the lateral surface (Figure 4b). At  
17 hatching, the ocular globe has a spherical shape with uniform pigmentation (Figure 3i;  
18 Figure 4b). Remarkably, the globe at this stage has a smaller surface area than that of  
19 mid-gestational embryos (Figure 4b). The change in morphology and size of the globe  
20 in a hatchling compared to that of a mid-gestational embryo suggests that the eye  
21 undergoes asymmetric retraction in the areas encompassing the developing central and  
22 temporal foveae during the period between mid-gestation and hatching.

23 To better understand the dynamics of globe morphogenesis in the brown anole, axial  
24 measurements along the three anatomical planes were made of eyes at embryonic  
25 stages St 4-18, hatchlings (Hch), and adults (Adt) (Figure S1; Table S1). To facilitate a  
26 quantitative comparison of changes in the three-dimensional shape of the eye, the three  
27 measurements of each eye were converted to a standardized metric (see *Whole Eye*  
28 *Measurements* in Methods). Briefly, in this metric the axial length of the y-axis, which  
29 did not exhibit appreciable elongation and retraction during development, was used as a  
30 normalization factor for measurements along the x- and z-axes. Variance due to  
31 differences in embryo body and eye size within an individual's stage group was handled



1 by multiplying the normalized measurements for each individual by the group mean  
2 value ( $\mu$ ) for the y-axis (Figure S1; Table S1). This operation resulted in an overall  
3 reduction in variance seen at each stage in both x- and z-axis<sub>N</sub> datasets, which  
4 suggests that the degree to which an eye elongates and retracts is proportional to the  
5 embryo's eye size (Figure S2).

6 Using the hatchling eye as a reference, regional differences in globe morphogenesis  
7 as a function of developmental stage were assessed by taking the raw y-axis dataset  
8 and the normalized datasets (x- and z-axis<sub>N</sub>) from every lizard and dividing these values  
9 with the corresponding mean of the raw y-, x-, and z-axial lengths of the hatchling (see  
10 *Whole Eye Measurements* in Methods). This analysis revealed four distinct phases in  
11 ocular morphogenesis (Figure 4c).

12 Phase 1, which occurs between embryonic St 4-8, is characterized by rapid growth  
13 of the eye. In embryos at St 4-5, the globe appears to expand uniformly along all 3  
14 axes, which suggests that ocular growth during this period is equally distributed across  
15 the eye. Although the St 5 eye is 50% smaller than the hatchling eye, the eye at these  
16 two stages is quite similar in overall shape (Figure 4b,c; Table S1). At St 6, the globe  
17 begins to exhibit asymmetric expansion, with more growth along the nasotemporal and  
18 lateromedial axes compared the dorsoventral axis. By St 7, expansion along the  
19 lateromedial axis is greater than along the nasotemporal axis.

20 The start of the phase 2 is defined as the developmental timepoint when  
21 morphological asymmetry of the globe is clearly visible. This condition is met at St 8. It  
22 is also at this point that the overall globe size is similar to that of the hatchling. Between  
23 St 8 and the close of the second phase at St 14, the globe continues to expand  
24 asymmetrically along the nasotemporal and lateromedial axes, with the more  
25 pronounced expansion along the lateromedial axis (Figure 4c,d). The globe reaches  
26 maximum lengths along the nasotemporal and lateromedial axes by St 14. At this stage  
27 the length of the lateromedial axis is 1.4x that of the hatchling, and the length of the  
28 nasotemporal axis is 1.2x that of the hatchling (Figure 4b,c).

29 Phase 3 is the epoch during which the globe begins to shorten in length along the  
30 nasotemporal and lateromedial axes to regain a spherical shape. This phase  
31 encompasses St 15-18 (Figure 4c,d), and corresponds to the time during which the



1 fovea acquires its distinctive morphological characteristics (Figure 3h,i). Upon  
2 completion of retraction, the eyes are slightly smaller than those of hatchlings (St 17-18;  
3 Figure 4c,d). The fourth, and final, phase is characterized by a uniform expansion of the  
4 globe, which begins at the close of St 18 and continues into adulthood (Figure 4c). From  
5 hatching, the eye doubles in size by the time the lizard reaches adulthood (Figure 4c).

6 To determine the magnitude of the asymmetric shape changes during ocular  
7 morphogenesis, measurements capturing the maximum extent of elongation (St 13-14,  
8 Figure 4c) were compared to those capturing the maximum extent of retraction (St 18-  
9 Hch, Figure 4c). Axial measurements of globes from lizards at St 13, 14 and 18, and  
10 hatching were compared using one-way ANOVA analyses (nonparametric Kruskal-  
11 Wallis test); normalized values were used for the nasotemporal and lateromedial axes  
12 (for mean and standard deviation, see Table. S1). Although measurements along the  
13 dorsoventral axis were not statistically different across these four developmental time  
14 periods (p-value 0.1585; alpha = 0.05), significant differences were observed for  
15 measurements along both the nasotemporal and lateromedial axes (p-value <0.0001 for  
16 both; alpha = 0.05).

17 Differences between the groups were compared using the Mann-Whitney test  
18 (Figure 4d). Among the normalized nasotemporal (x-axis<sub>N</sub>) datasets, St 13 and 14  
19 measurements were significantly different from the St 18 and the hatchling (p-value  
20 <0.0001 for both; alpha = 0.05) but not between St 13 and 14 (p-value 0.1244). Similar  
21 results were observed among the normalized lateromedial (z-axis<sub>N</sub>) measurements. For  
22 St 18 compared to hatchling, x-axis<sub>N</sub> and z-axis<sub>N</sub> lengths were significantly different (p-  
23 value <0.0001, and p-value of 0.0017, respectively). This suggests that by St 18 ocular  
24 retraction is finished and the expansion phase is already well underway by the time of  
25 hatching. The large difference in mean x- and z- axis<sub>N</sub> lengths between St 14 and 18 (z-  
26 axis<sub>N</sub> 2647 to 1807 μm; x-axis<sub>N</sub>, 2663 to 2151 μm) equated to a 32% and 19% reduction  
27 in the central and temporal regions, respectively (Figure 4d).

28 Changes in intraocular pressure can be one mechanism that drives globe  
29 expansion and retraction. Using an inflated ball as a model, morphological indicators of  
30 a pressurized globe could include a taut ocular surface that resists deformation.  
31 Conversely, using an under-inflated ball as a model, a previously-pressurized globe that

1 has lost pressure might exhibit wrinkles or folds of the surface and be more flaccid. The  
2 surfaces of globes prior to St 16 were smooth and taut to the touch. In contrast, starting  
3 at St 17, the exterior ocular surface was easily depressed with a pair of dull forceps and  
4 wrinkles could be clearly seen in about half of the eyes examined (7/13 St 17 lizards)  
5 (Figure 5). At St 18, wrinkling could still be detected (8/19 lizards), although it was not  
6 as pronounced. By hatching, the majority of globes (9/10 lizards) were completely  
7 smooth and once again the ocular surface was taut (Figure 5a). For developmental  
8 stages between St 14 and hatching, wrinkled eyes tended to have reduced normalized  
9 measurements along the lateromedial (z-axis<sub>N</sub>) compared to smooth eyes (Figure 5c).

10

### 11 ***Ocular elongation & retraction in other foveated lizards***

12 To test if ocular elongation and retraction occurs in other foveated lizards, ocular  
13 morphogenesis was examined in the veiled chameleon lizard, *Chamaeleo calypttratus*.  
14 This species was chosen because it possesses a single, prominent central fovea that is  
15 completely devoid of all retina cell layers.<sup>40</sup> Chameleon embryos were collected at  
16 several time points throughout development. To facilitate comparison with anoles,  
17 chameleon embryos were staged following criteria described by Diaz et al., 2017 and  
18 Diaz et al., 2019 and then matched to the anole using Sanger's morphological criteria.<sup>37-</sup>  
19 <sup>39</sup> Only embryonic stages were used for this study; chameleon embryos collected just  
20 prior to the expected hatching date are denoted as pre-hatch "pHch" (Table S2).

21 As observed for *A. sagrei*, ocular globe morphogenesis in *C. calypttratus* includes  
22 pronounced asymmetric elongation along the lateromedial axis (Figure 6). In contrast  
23 with *A. sagrei*, *C. calypttratus* embryos exhibit comparable expansion along both the  
24 dorsoventral and nasotemporal axes (Figure 6). As with the anole, ocular elongation is  
25 followed by a period of retraction that ends when the globe regains a spherical shape.  
26 Compared with the anole, the elongated region in chameleon is less acute and occurs  
27 over a broader area; in the anole, the elongated medial face appears more acute and  
28 funnel-like (Compare St 13 chameleon in Figure 6B to St 13 anole in Figure 4b).  
29 Despite this difference in morphology, the onset of ocular elongation and retraction  
30 timing is nearly identical to anoles. For instance, ocular elongation begins around stage  
31 6 and peaks by stage 14. This is followed by ocular retraction, which starts at stage 15

1 and plateaus just before hatching (Figure 6c). The chameleon fovea also develops  
2 during the period of retraction (between stages 16-18) (Figure 6c), and its progression  
3 also matches that of the anole (data not shown).

4

## 5 **Discussion**

6       The work we present here is a first step in establishing the brown anole as a new  
7 model organism for fovea developmental studies. A primary motivation for choosing this  
8 lizard is that the anole eye contains two fovea that represent the extremes of fovea  
9 morphology: a central fovea with a pit devoid of all retina cell layers and a temporal  
10 fovea with a shallow pit that retains the retinal layers. Most vertebrate species do not  
11 have fovea, but in those that do, the fovea can differ greatly in pit shape, depth, and  
12 diameter.<sup>19,41-44</sup> In humans, only the GCL and INL retinal layers are laterally displaced,  
13 while the ONL is retained. This results in a broad and relatively shallow foveal pit with a  
14 high density of photoreceptor cells at its center.<sup>30,45-49</sup> This is also true of most foveated  
15 non-human primates. Although in some species, the GCL and/or INL are retained, and  
16 as a result, only a rudimentary pit is present.<sup>44,50-53</sup> The fovea of birds is variable, and,  
17 like the anole, some species are bifoveated, while others only possess a single fovea  
18 located either in the central or temporal retinal regions.<sup>43</sup>

19       Anoles are the only squamate genus known to have a bifoveated retina. Among  
20 the anole species studied, all have a prominent central fovea devoid of cell layers and a  
21 shallower temporal fovea that retains these layers.<sup>19,20,54</sup> Slight variations in pit depth  
22 have been observed across anoles and correlate with prey size.<sup>19</sup> For instance, anole  
23 species that routinely eat smaller prey have considerably deeper temporal foveae. As in  
24 birds, the location of the fovea in different squamate reptiles varies. In diurnal geckos  
25 only a temporal fovea is present.<sup>55-59</sup> Although all layers are generally present in these  
26 lizards, the degree of lateral displacement ranges from partial to full layer retention. In  
27 both *Lygodactylus* and *Gonatodes* geckos, which belong to the family  
28 *Sphaerodactylinae*, the GCL is nearly absent, while the INL is only thinned and ONL  
29 packing is present at the foveal pit center.<sup>57</sup> In contrast, *Phelsuma* geckos have only the  
30 shallowest of depressions absent of any pronounced displacement of GCL and INL,  
31 resulting in a pit similar to the temporal fovea of anoles.<sup>57,58</sup> In other lizards, including

1 chameleons, the opposite is generally true, with most having a large prominent central  
2 fovea devoid completely of retinal cell layers.<sup>60,61</sup>

3 We observed four distinct phases of ocular morphogenesis in anoles and  
4 chameleons. The first was a period of symmetrical growth that occurred during the first  
5 week of embryonic development post-fertilization. At the end of this period, the retina  
6 was thicker and exhibited a mounded appearance in the prospective foveal regions  
7 (Figure 3g). This was followed by a second period, defined by asymmetrical growth,  
8 where the regions that eventually gave rise to the fovea became strikingly elongated.  
9 Coincidentally, this period also marks the gradual disappearance of retinal mounding  
10 within the foveal regions (*Rasys et al.*, in prep). By late development, when the foveae  
11 take on their characteristic morphology, these regions appear to undergo retraction  
12 coincident with retinal remodeling, i.e., pit formation and photoreceptor cell packing. The  
13 fourth phase was characterized by a uniform expansion of the globe. In both the brown  
14 anole and the veiled chameleon the regions that undergo elongation and retraction are  
15 localized to areas of the retina where the foveae develop. Additionally, these foveal  
16 regions, characterized by early retinal mounding, undergo retina differentiation and  
17 lamination prior to the rest of the retina (*Rasys et al.*, in prep). These observations  
18 suggest a relationship between changes in retinal differentiation, ocular shape, and  
19 foveal development.

20 We propose that ocular elongation followed by retraction are necessary steps in  
21 the retinal remodeling needed to generate a fovea in vertebrates. Consistent with this  
22 idea, evidence of asymmetrical globe development can be seen in the eyes of diurnal,  
23 but not nocturnal, New World dwarf geckos (*Sphaerodactylinae*) as shown in Figures 2  
24 and 3 of Guerra-Fuentes and colleagues publication addressing the embryology of the  
25 retinal pigmented epithelium in five species of sphaerodactyls.<sup>32</sup> Among mammals,  
26 asymmetric globe development has been observed only for foveated haplorrhine  
27 primates but not for non-foveated primates or other mammalian species.<sup>24-31</sup> Together,  
28 these observations suggest that fovea morphogenesis is similar among foveated  
29 vertebrates. It will be interesting to learn if the eyes of foveated birds and fish undergo  
30 similar morphogenetic changes during development.

1           In the brown anole, we noted that the magnitude of asymmetric ocular shape  
2 changes during development appeared proportional to the extent of retinal remodeling  
3 associated with formation of the morphologically dramatic central fovea compared to the  
4 less distinct temporal fovea. We speculate that the process of elongation and retraction  
5 of required for fovea formation, and that the relative extent to which an eye elongates  
6 and retracts during fovea-genesis is directly proportional to the amount of retinal  
7 remodeling required to make that particular fovea. If true, this may explain the variability  
8 of fovea morphology present within each foveated species.

9           Several different mechanisms could mediate changes in the size and shape of  
10 the ocular globe during development. We hypothesize that changes in intraocular  
11 pressure (IOP) contribute to asymmetric ocular morphogenesis in the brown anole. This  
12 idea arises from our observations that the embryonic anole eye appears to be  
13 pressurized during peak periods of elongation and deflated during retraction. The idea  
14 that IOP can drive ocular growth is not a new one. Previous studies have shown that  
15 IOP plays a pivotal role in regulating normal ocular growth in chick<sup>62</sup> and increases in  
16 IOP can lead to induced myopia (generalized axial elongation of the globe) in this  
17 animal.<sup>63,64</sup> In foveated primates, Hendrickson and Springer proposed a model where  
18 high IOP induces pit formation due to inherent increased elasticity present at the foveal  
19 avascular zone, while “retinal stretching” induced by ocular growth, facilitates the  
20 centripetal movement of photoreceptor cells towards the foveal center.<sup>65-67</sup> Although, it  
21 is possible that lack of blood vessels would predispose this region of the primate retina  
22 to be more susceptible to IOP and, therefore, form a pit, this cannot explain pit  
23 formation in the lizard. Anoles have a retina that is entirely avascular.<sup>42,54</sup> This suggests  
24 that if regional differences in retinal elasticity are present in the anole, they are unlikely  
25 to be caused by avascular zones. Another challenge with this model, as applied to  
26 anoles, is that it requires IOP to be high for pit formation to occur. In the brown anole, pit  
27 formation occurs during the period that the eye is soft, indicating that IOP is low.

28           We propose, for anoles at least, that high IOP is involved in facilitating ocular  
29 elongation, but that IOP is comparatively low during ocular retraction and pit formation.  
30 As for Hendrickson and Springer’s model, there must be additional mechanisms that  
31 mediate regional differences in the elasticity of the foveal anlagen compared to other

1 regions of the ocular globe. We think it likely that regional and dynamic changes in the  
2 elasticity of the tissues associated with the outer surface of the globe are required for  
3 normal eye development in foveated lizards, and may be true for primates as well.

4

#### 5 **Acknowledgements**

6       The authors thank Aaron Alcalá, Sergio Minchey, Sukhada Samudra, Christina  
7 Sabin, and Rebecca Ball of the Menke and Lauderdale research groups at the  
8 University of Georgia, and Diana Baumann, Richard Kupronis, David Jewell, Alex  
9 Muensch and Nikki Inlow of the Reptile and Aquatic Facility at the Stowers Institute for  
10 Medical Research, for their help with animal husbandry, maintenance and care of the  
11 anolis and chameleon colonies, respectively. The authors thank Drs. Jonathan  
12 Eggenschwiler, Heike Kroeger and Robert Hufnagel, and Christina Sabin, Sukhada  
13 Samudra, and Rida Osman for helpful discussions about this project and comments on  
14 the manuscript.

1 **References:**

- 2 1. Tsonis PA. *Animal models in eye research*. Academic Press; 2008.
- 3 2. Wittbrodt J, Shima A, Schartl M. Medaka--a model organism from the far East. *Nat*  
4 *Rev Genet*. Jan 2002;3(1):53-64. <https://doi.org/10.1038/nrg704>.
- 5 3. McKusick VA. Mendelian Inheritance in Man and its online version, OMIM. *Am J Hum*  
6 *Genet*. Apr 2007;80(4):588-604. <https://doi.org/10.1086/514346>.
- 7 4. Miesfeld JB, Brown NL. Eye organogenesis: A hierarchical view of ocular  
8 development. *Curr Top Dev Biol*. 2019;132:351-393.  
9 <https://doi.org/10.1016/bs.ctdb.2018.12.008>.
- 10 5. Chow RL, Lang RA. Early eye development in vertebrates. *Annu Rev Cell Dev Biol*.  
11 2001;17:255-96.
- 12 6. Fuhrmann S. Eye morphogenesis and patterning of the optic vesicle. *Curr Top Dev*  
13 *Biol*. 2010;93:61-84. <https://doi.org/10.1016/b978-0-12-385044-7.00003-5>.
- 14 7. Saha MS, Servetnick M, Grainger RM. Vertebrate eye development. *Curr Opin Genet*  
15 *Dev*. 1992;2(4):582-8.
- 16 8. Uetz P, Stylianou A. The original descriptions of reptiles and their subspecies.  
17 *Zootaxa*. Jan 24 2018;4375(2):257-264. <https://doi.org/10.11646/zootaxa.4375.2.5>.
- 18 9. Losos JB, Schneider CJ. Anolis lizards. *Curr Biol*. Apr 28 2009;19(8):R316-8.  
19 <https://doi.org/10.1016/j.cub.2009.02.017>.
- 20 10. Eckalbar WL, Lasku E, Infante CR, et al. Somitogenesis in the anole lizard and  
21 alligator reveals evolutionary convergence and divergence in the amniote  
22 segmentation clock. *Dev Biol*. Mar 1 2012;363(1):308-19.  
23 <https://doi.org/10.1016/j.ydbio.2011.11.021>.
- 24 11. Park S, Infante CR, Rivera-Davila LC, Menke DB. Conserved regulation of hoxc11 by  
25 pitx1 in Anolis lizards. *J Exp Zool B Mol Dev Evol*. May 2014;322(3):156-65.  
26 <https://doi.org/10.1002/jez.b.22554>.
- 27 12. Sanger TJ, Kircher BK. Model Clades Versus Model Species: Anolis Lizards as an  
28 Integrative Model of Anatomical Evolution. *Methods Mol Biol*. 2017;1650:285-297.  
29 [https://doi.org/10.1007/978-1-4939-7216-6\\_19](https://doi.org/10.1007/978-1-4939-7216-6_19).
- 30 13. Sanger TJ, Revell LJ, Gibson-Brown JJ, Losos JB. Repeated modification of early limb  
31 morphogenesis programmes underlies the convergence of relative limb length in



- 1 Anolis lizards. *Proc Biol Sci*. Feb 22 2012;279(1729):739-48.  
2 <https://doi.org/10.1098/rspb.2011.0840>.
- 3 14. Sanger TJ, Seav SM, Tokita M, et al. The oestrogen pathway underlies the evolution  
4 of exaggerated male cranial shapes in Anolis lizards. *Proc Biol Sci*. Jun 07  
5 2014;281(1784):20140329. <https://doi.org/10.1098/rspb.2014.0329>.
- 6 15. Tollis M, Hutchins ED, Stapley J, et al. Comparative Genomics Reveals Accelerated  
7 Evolution in Conserved Pathways during the Diversification of Anole Lizards.  
8 *Genome Biol Evol*. Feb 1 2018;10(2):489-506. <https://doi.org/10.1093/gbe/evy013>.
- 9 16. Infante CR, Mihala AG, Park S, et al. Shared Enhancer Activity in the Limbs and  
10 Phallus and Functional Divergence of a Limb-Genital cis-Regulatory Element in  
11 Snakes. *Dev Cell*. Oct 12 2015;35(1):107-19.  
12 <https://doi.org/10.1016/j.devcel.2015.09.003>.
- 13 17. Infante CR, Rasys AM, Menke DB. Appendages and gene regulatory networks:  
14 Lessons from the limbless. *Genesis*. Jan 2018;56(1).  
15 <https://doi.org/10.1002/dvg.23078>.
- 16 18. Rasys AM, Park S, Ball RE, Alcala AJ, Lauderdale JD, Menke DB. CRISPR-Cas9 Gene  
17 Editing in Lizards through Microinjection of Unfertilized Oocytes. *Cell Reports*. Aug  
18 27 2019;28(9):2288-+. <https://doi.org/10.1016/j.celrep.2019.07.089>.
- 19 19. Fite KV, Lister BC. Bifoveal vision in anolis lizards. *Brain Behav Evol*. 1981;19(3-  
20 4):144-54. <https://doi.org/10.1159/000121639>.
- 21 20. Sannan NS, Shan X, Gregory-Evans K, Kusumi K, Gregory-Evans CY. Anolis  
22 carolinensis as a model to understand the molecular and cellular basis of foveal  
23 development. *Exp Eye Res*. Aug 2018;173:138-147.  
24 <https://doi.org/10.1016/j.exer.2018.05.012>.
- 25 21. Chakraborty R, Read SA, Vincent SJ. Understanding myopia: Pathogenesis and  
26 mechanisms. *Updates on Myopia*. Springer, Singapore; 2020:65-94.
- 27 22. Harper AR, Summers JA. The dynamic sclera: extracellular matrix remodeling in  
28 normal ocular growth and myopia development. *Exp Eye Res*. Apr 2015;133:100-11.  
29 <https://doi.org/10.1016/j.exer.2014.07.015>.
- 30 23. Young TL. Molecular genetics of human myopia: an update. *Optom Vis Sci*. Jan  
31 2009;86(1):E8-E22. <https://doi.org/10.1097/OPX.0b013e3181940655>.

- 1 24. Badtke G. Entwicklungsmechanische Faktoren bei der Formgebung des  
2 embryonalen Augapfels. *Albrecht von Graefes Archiv für Ophthalmologie*.  
3 1952/11/01 1952;152(6):671-688. <https://doi.org/10.1007/BF00685239>.
- 4 25. Ehlers N, Matthiessen ME, Andersen H. The prenatal growth of the human eye. *Acta*  
5 *ophthalmologica*. 1968;46(3):329-349.
- 6 26. Pilleri G. [Comparative anatomical examination of the "protuberantia scleralis" of  
7 the eye]. *Acta Anat (Basel)*. 1960;41:131-7.
- 8 27. van L, Pilleri G. [Morphological research on the "scleral protuberance"]. *Albrecht Von*  
9 *Graefes Arch Ophthalmol*. 1961;163:1-9. <https://doi.org/10.1007/bf00684908>.
- 10 28. Streeten BW. Development of the Human Retinal Pigment Epithelium and the  
11 Posterior Segment. *Archives of Ophthalmology*. Mar 01 1969;81(3):383-394.
- 12 29. Sondermann R. Die Bedeutung der Vererbung für die Entwicklung der Myopie.  
13 *Albrecht von Graefes Archiv für klinische und experimentelle Ophthalmologie*.  
14 1950;151(1):200-208.
- 15 30. Hendrickson A. Development of Retinal Layers in Prenatal Human Retina.  
16 2015;166:29-35.
- 17 31. Springer AD, Hendrickson aE. Development of the primate area of high acuity, 3:  
18 temporal relationships between pit formation, retinal elongation and cone packing.  
19 *Visual Neuroscience*. Mar 2005;22(2):171-185.  
20 <https://doi.org/10.1017/S095252380522206X>.
- 21 32. Guerra-Fuentes RA, Bauer AM, Daza JD. The embryology of the retinal pigmented  
22 epithelium in dwarf geckos (Gekkota: Sphaerodactylinae): a unique developmental  
23 pattern. *BMC Developmental Biology*. 2014;14(1):29. [https://doi.org/10.1186/1471-](https://doi.org/10.1186/1471-213X-14-29)  
24 [213X-14-29](https://doi.org/10.1186/1471-213X-14-29).
- 25 33. SANGER TJ, HIME PM, JOHNSON MA, DIANI J, LOSOS JB. Laboratory protocols for  
26 husbandry and embryo collection of Anolis lizards. *Herpetological Review*.  
27 2008;39(1):58-63.
- 28 34. Association AVM. AVMA Guidelines for the Euthanasia of Animals: 2020 Edition.  
29 2020.

- 1 35. Conroy CJ, Papenfuss T, Parker J, Hahn NE. Use of tricaine methanesulfonate  
2 (MS222) for euthanasia of reptiles. *Journal of the American Association for*  
3 *Laboratory Animal Science : JAALAS*. 2009;48(1):28-32.
- 4 36. Diaz RE, Jr., Anderson CV, Baumann DP, et al. Captive Care, Raising, and Breeding of  
5 the Veiled Chameleon (*Chamaeleo calyptratus*). *Cold Spring Harb Protoc*. Aug 26  
6 2015;2015(10):943-9. <https://doi.org/10.1101/pdb.prot087718>.
- 7 37. Diaz RE, Jr., Shylo NA, Roellig D, Bronner M, Trainor PA. Filling in the phylogenetic  
8 gaps: Induction, migration, and differentiation of neural crest cells in a squamate  
9 reptile, the veiled chameleon (*Chamaeleo calyptratus*). *Dev Dyn*. Aug  
10 2019;248(8):709-727. <https://doi.org/10.1002/dvdy.38>.
- 11 38. Sanger TJ, Losos JB, Gibson-Brown JJ. A developmental staging series for the lizard  
12 genus *Anolis*: a new system for the integration of evolution, development, and  
13 ecology. *J Morphol*. Feb 2008;269(2):129-37. <https://doi.org/10.1002/jmor.10563>.
- 14 39. Diaz RE, Jr., Bertocchini F, Trainor PA. Lifting the Veil on Reptile Embryology: The  
15 Veiled Chameleon (*Chamaeleo calyptratus*) as a Model System to Study Reptilian  
16 Development. *Methods Mol Biol*. 2017;1650:269-284. [https://doi.org/10.1007/978-  
17 1-4939-7216-6\\_18](https://doi.org/10.1007/978-1-4939-7216-6_18).
- 18 40. Hulke JW. On the chameleon's retina; a further contribution to the minute anatomy  
19 of the retina of reptiles. *Philosophical Transactions of the Royal Society of London*.  
20 1866;(156):223-229.
- 21 41. Slonaker JR. *A comparative study of the area of acute vision in vertebrates*. Boston:  
22 Ginn & company; 1897:1 p.l., p. [445]-502.
- 23 42. Walls GL, Walls GL. The vertebrate Eye and Its Adaptive Radiation. 1942:1-785.
- 24 43. Fite KV, Rosenfield-Wessels S. A comparative study of deep avian foveas. *Brain,*  
25 *Behav Evol*. 1975;12:97-115.
- 26 44. Ross CF. The Tarsier Fovea: Functionless Vestige or Nocturnal Adaptation? In: Ross  
27 CF, Kay RF, eds. *Anthropoid Origins: New Visions*. Boston, MA: Springer US;  
28 2004:477-537.
- 29 45. Hendrickson A. A morphological comparison of foveal development in man and  
30 monkey. *Eye (Lond)*. 1992;6 ( Pt 2):136-44. <https://doi.org/10.1038/eye.1992.29>.

- 1 46. Hendrickson a, Drucker D. The development of parafoveal and mid-peripheral  
2 human retina. *Behav Brain Res.* Jul 31 1992;49(1):21-31.  
3 [https://doi.org/10.1016/S0166-4328\(05\)80191-3](https://doi.org/10.1016/S0166-4328(05)80191-3).
- 4 47. Hendrickson A, Possin D, Vajzovic L, Toth CA. Histologic development of the human  
5 fovea from midgestation to maturity. *Am J Ophthalmol.* Nov 2012;154(5):767-778  
6 e2. <https://doi.org/10.1016/j.ajo.2012.05.007>.
- 7 48. Hendrickson AE, Yuodelis C. The morphological development of the human fovea.  
8 *Ophthalmology.* Jun 1984;91(6):603-12.
- 9 49. Yuodelis C, Hendrickson A. A qualitative and quantitative analysis of the human  
10 fovea during development. *Vision Res.* 1986;26(6):847-55.
- 11 50. Webb SV, Kaas JH. The sizes and distribution of ganglion cells in the retina of the owl  
12 monkey. *Aotus trivirgatus. Vision Research.* 1976;16(11):1247-1254.  
13 [https://doi.org/10.1016/0042-6989\(76\)90049-3](https://doi.org/10.1016/0042-6989(76)90049-3).
- 14 51. Stone J, Stone J, Johnston E, Johnston E. The topography of primate retina: a study of  
15 the human, bushbaby, and new- and old-world monkeys. [Case Report]. *Journal of*  
16 *Comparative Neurology.* Feb 20 1981;196(2):205-223.  
17 <https://doi.org/10.1002/cne.901960204>.
- 18 52. DeBruyn EJ, Wise VL, Casagrande VA. The size and topographic arrangement of  
19 retinal ganglion cells in the galago. *Vision Res.* 1980;20(4):315-27.  
20 [https://doi.org/10.1016/0042-6989\(80\)90018-8](https://doi.org/10.1016/0042-6989(80)90018-8).
- 21 53. Collins CE, Hendrickson A, Kaas JH. Overview of the visual system of tarsius. *The*  
22 *Anatomical Record Part A: Discoveries in Molecular, Cellular, and Evolutionary*  
23 *Biology.* 2005;287A(1):1013-1025. <https://doi.org/10.1002/ar.a.20263>.
- 24 54. Makaretz M, Levine RL. A light microscopic study of the bifoveate retina in the lizard  
25 *Anolis carolinensis* general observation and convergence ratios. *Vision Res.*  
26 1980;20:679-686.
- 27 55. Underwood G. Reptilian retinas. *Nature.* Feb 3 1951;167(4240):183-5.
- 28 56. Underwood G. On the classification and evolution of geckos. *Proceedings of the*  
29 *Zoological Society of London.* 1954/11/01 1954;124(3):469-492.  
30 <https://doi.org/10.1111/j.1469-7998.1954.tb07789.x>.

- 1 57. Röhl B. Gecko vision—retinal organization, foveae and implications for binocular  
2 vision. *Vision Research*. Jul 2001;41(16):2043-2056. [https://doi.org/10.1016/S0042-](https://doi.org/10.1016/S0042-6989(01)00093-1)  
3 [6989\(01\)00093-1](https://doi.org/10.1016/S0042-6989(01)00093-1).
- 4 58. Tansley K. The retina of a diurnal gecko. *Pflüger's Archiv für die gesamte Physiologie*  
5 *des Menschen und der Tiere*. 1961/05/01 1961;272(3):262-269.  
6 <https://doi.org/10.1007/BF00363014>.
- 7 59. Tansley K. The gecko retina. *Vision Res*. 1964;4:33-37.
- 8 60. Hulke JW. On the Chameleon's Retina; A Further Contribution to the Minute  
9 Anatomy of the Retina of Reptiles. *Philosophical Transactions of the Royal Society of*  
10 *London*. 1866;156:223-229.
- 11 61. Detwiler SR, Laurens H. STUDIES ON THE RETINA THE STRUCTURE OF THE  
12 RETINA OF PHRYNOSOMA CORNUTUM. *J Comp Neurol*. 1920;32(3):347-356.
- 13 62. Schmid KL, Hills T, Abbott M, Humphries M, Pyne K, Wildsoet CF. Relationship  
14 between intraocular pressure and eye growth in chick. *Ophthalmic and Physiological*  
15 *Optics*. Jan 2003;23(1):25-33. <https://doi.org/10.1046/j.1475-1313.2003.00085.x>.
- 16 63. Phillips JR, McBrien NA. Pressure-induced changes in axial eye length of chick and  
17 tree shrew: significance of myofibroblasts in the sclera. *Investigative Ophthalmology*  
18 *& Visual Science*. Mar 2004;45(3):758-763. [https://doi.org/10.1167/iovs.03-](https://doi.org/10.1167/iovs.03-0732)  
19 [0732](https://doi.org/10.1167/iovs.03-0732).
- 20 64. Genest R, Chandrashekar N, Irving E. The effect of intraocular pressure on chick eye  
21 geometry and its application to myopia. *Acta of Bioengineering and Biomechanics*.  
22 2012;14(2):3-8. <https://doi.org/10.5277/abb120201>.
- 23 65. Springer AD. New role for the primate fovea : A retinal excavation determines  
24 photoreceptor deployment and shape. 1999;16(0):629-636.
- 25 66. Springer AD, Hendrickson aE. Development of the primate area of high acuity. 1. Use  
26 of finite element analysis models to identify mechanical variables affecting pit  
27 formation. *Visual Neuroscience*. Jan 2004;21(1):53-62.  
28 <https://doi.org/http://dx.doi.org/10.1017/S0952523804041057>.
- 29 67. Provis JM, Dubis AM, Maddess T, Carroll J. Adaptation of the central retina for high  
30 acuity vision: cones, the fovea and the avascular zone. *Prog Retin Eye Res*. Jul  
31 2013;35:63-81. <https://doi.org/10.1016/j.preteyeres.2013.01.005>.

1 **Figure Legends**

2  
3 Figure 1. Adult anole eye. Top panel (a) shows adult male lizard with an enlarged view  
4 of its left eye. Bottom panels show a lateral view (b) and dorsal view (c) of a right eye.  
5 Directionality is designated by arrows and the letters T – temporal, N – nasal, D –  
6 dorsal, and V – ventral. Markers indicate: white arrow heads with notches – dorsal  
7 (green) and ventral (white) iris notches; asterisks (magenta)– individual sclera ossicle  
8 sheets; narrow white arrow heads (b) – dorsal blood vessel, (c) temporal sclera ossicle  
9 deformation; black arrow – optic nerve; crosshair – dorsal optical axis; and scale bars –  
10 1 mm.

11  
12 Figure 2. Anole eye organization and retinal layout. Left panel (a) shows a diagram  
13 labeling structures present in a horizontally sectioned adult eye. Right panels show  
14 magnified views of temporal (b) and center (c) foveae. Note: temporal fovea shown in  
15 (b) is 150  $\mu\text{m}$  deep to the plane of section in (a). Markers indicate GCL – ganglion cell  
16 layer; INL – inner nuclear layer; ONL – outer nuclear layer; RPE – retina pigmented  
17 epithelium; Ch – choroid; Scl – sclera; and scale bars – 1mm (a) and 50 $\mu\text{m}$  (b and c).

18  
19 Figure 3. Developmental series of early, mid, and late embryonic stages of eye  
20 morphogenesis. Top panel shows an array of early-stage embryos (PL1, PL3, and St 4)  
21 during optic vesicle (a), len's pit (b), and lens separation (c). Bottom panel shows later  
22 stages (St 5, 13, and Hch) along with histological sections through the eye's center  
23 horizontal plane. Black arrow – temporal eye region; open arrows – center and closed  
24 arrows – temporal retinal and fovea regions; and scale bars are 250  $\mu\text{m}$  (a-c, g-i) and 1  
25 mm (d-f).

26  
27 Figure 4. Anole eyes undergo asymmetrical ocular elongation followed by retraction  
28 during embryonic development. (a) Diagram illustrating orientation of y- (green), x-  
29 (blue), and z-axis (magenta) ocular measurements. (b) Lateral (top) and dorsal (bottom)  
30 views of whole right eyes from early (St 5), mid (St 13), and late (Hch) stages. Ocular  
31 elongation and retraction phases are evident in the stage 13 embryo and hatchling,  
32 respectively. All eyes are to scale with one another; scale bar is 1 mm. (c) Graph



1 displaying trends in ocular morphogenesis throughout development (St 4-Hch) and  
2 adulthood (Adt F – adult female; Adt M – adult male). This graph was generated by  
3 taking each lizard's ocular dimensions (y-axis and normalized x- and z-axis<sub>N</sub>) and  
4 dividing it by the mean ( $\mu$ ) hatchling ocular dimensions (y-, x-, and z-axis) to calculate a  
5 ratio. (d) Direct comparison of ocular length along different axes reveals the degree of  
6 ocular elongation (St 13-14) and subsequent retraction (St 18-Hch) in the anole eye.

7

8 Figure 5. The formation of surface wrinkles coincides with ocular retraction. (a) Dorsal  
9 views of whole right eyes from stages 16 - Hatchling showing the progressive steps of  
10 ocular retraction; scale bar – 1 mm. (b) An enlarged view of the St 17 eye from panel  
11 (a); arrow heads mark folds/wrinkles present along the outer ocular surface. (c) ocular  
12 dimensions along the z-axes relative to the hatchling eye; eyes where folds/wrinkles  
13 were observed are indicated in magenta.

14

15 Figure 6. Chameleon eyes also undergo asymmetrical ocular elongation followed by  
16 retraction during embryonic development. Diagram (a) demonstrates how y- (green), x-  
17 (blue), and z-axis (magenta) ocular measurements were made. Image (b) shows lateral  
18 (top) and dorsal (bottom) views of whole fixed right eyes from early (St 6), mid (St 13),  
19 and late (St 18) embryonic development. Like the anole, ocular elongation (St 13) and  
20 retraction (St 18) phases are evident. All eyes are to scale; scale bar is 1 mm. Graph  
21 (c) summarizes trends in chameleon ocular morphogenesis throughout stages 4-pHch  
22 (pHch – just prior to hatching). This graph was generated by taking each lizard's ocular  
23 dimensions (y-axis and normalized x- and z-axis<sub>N</sub>) and dividing it by the mean ( $\mu$ ) pHch  
24 ocular dimensions (y-, x-, and z-axis) to calculate a ratio. Graph (d) compares the  
25 degree of ocular elongation (St 14) and subsequent retraction (Hch and pHch) between  
26 anoles (grey circles) and chameleons (color triangles: y-axis – green, x-axis<sub>N</sub> – blue,  
27 and z-axis<sub>N</sub> – magenta). Calculations were made following same formula outlined above  
28 in graph (c) for each respective species. Graph (e) indicates the relative percentage of  
29 retraction occurring in chameleons between stage 14 and pHch.



Figure 1

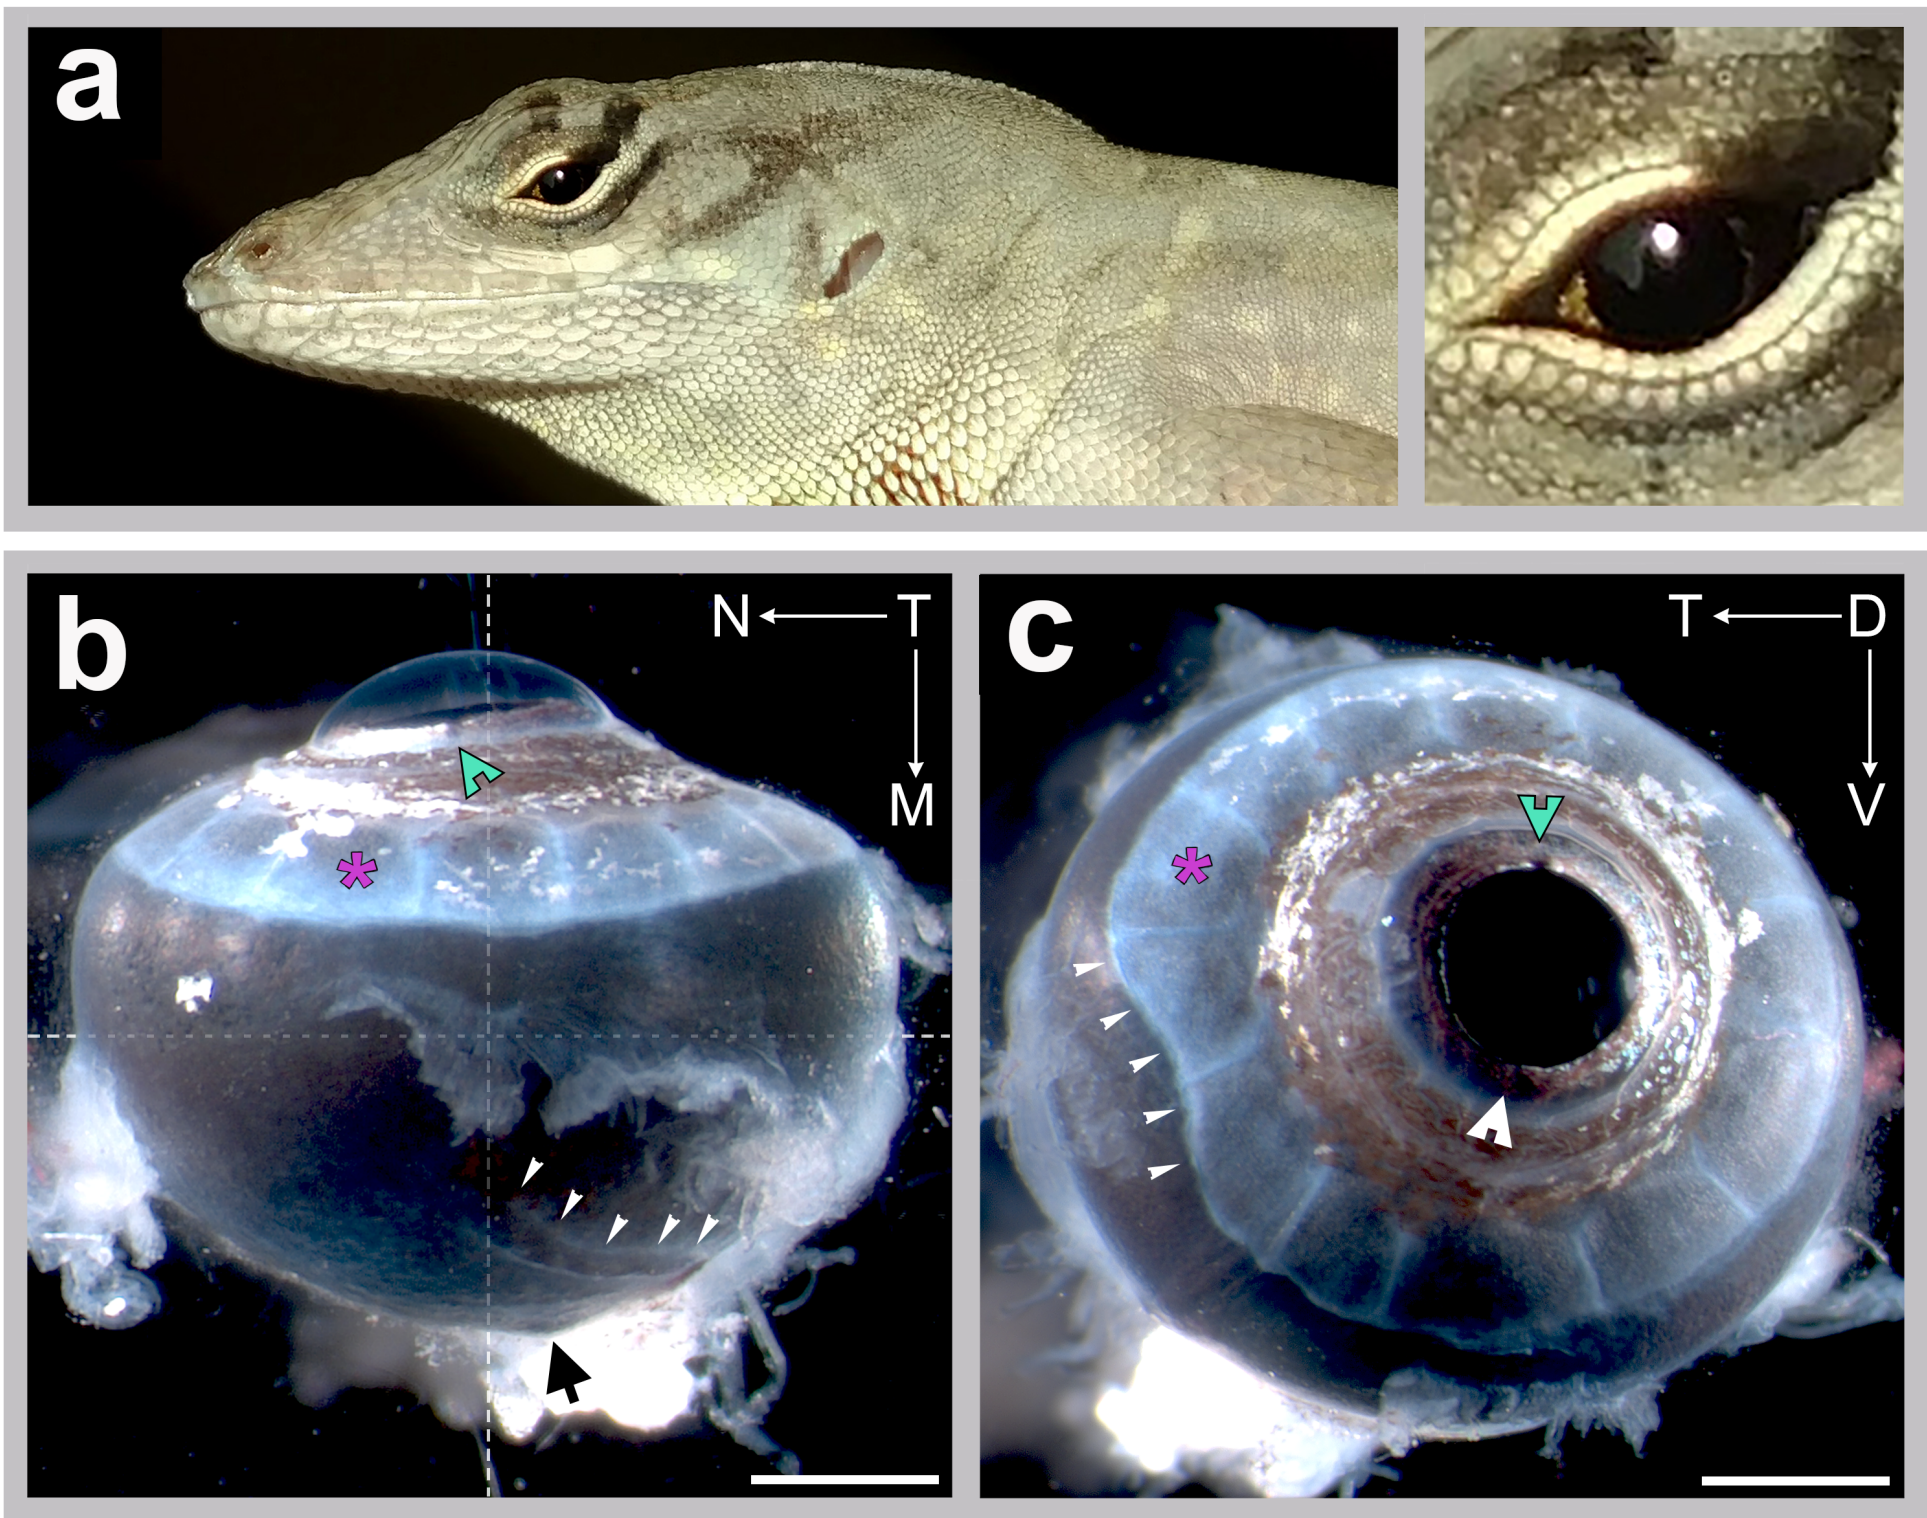



Figure 2

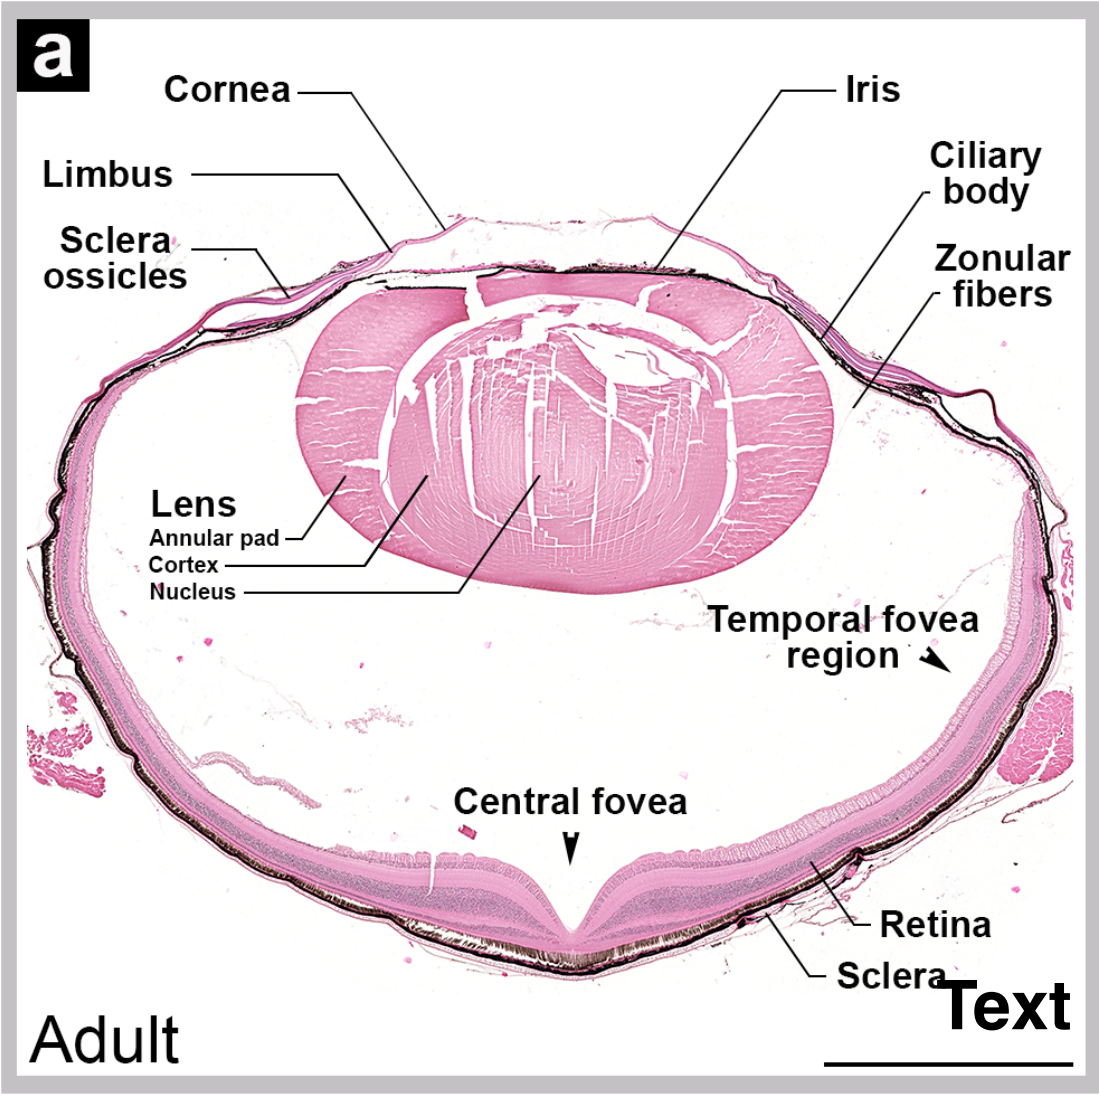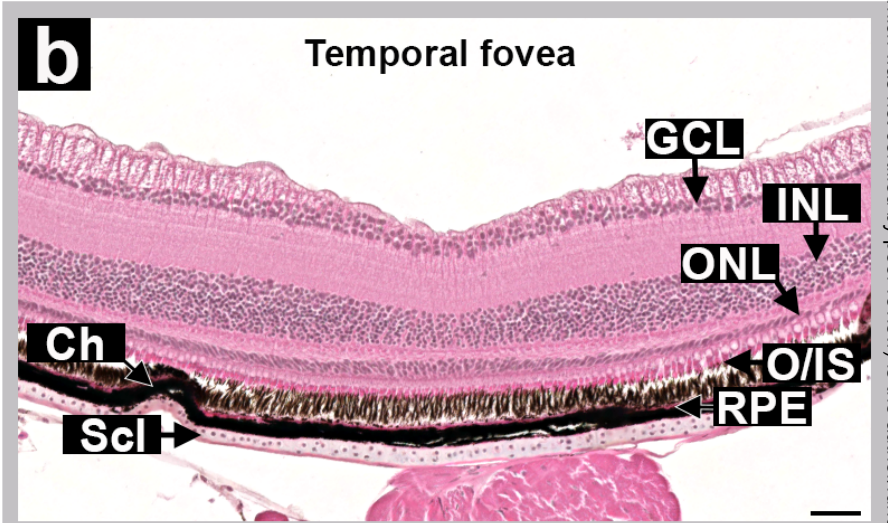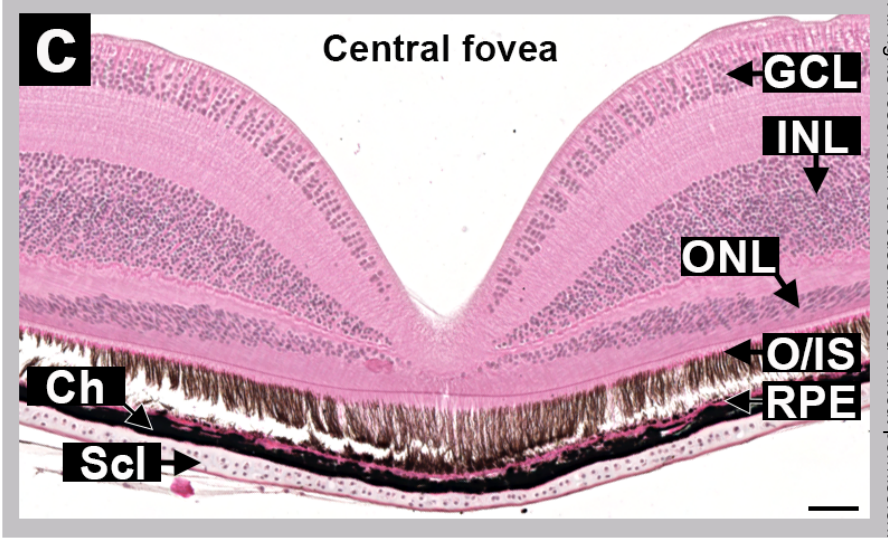

bioRxiv preprint doi: <https://doi.org/10.1101/2021.01.20.427408>; this version posted January 21, 2021. The copyright holder for this preprint (which was not certified by peer review) is the author/funder. All rights reserved. No reuse allowed without permission.



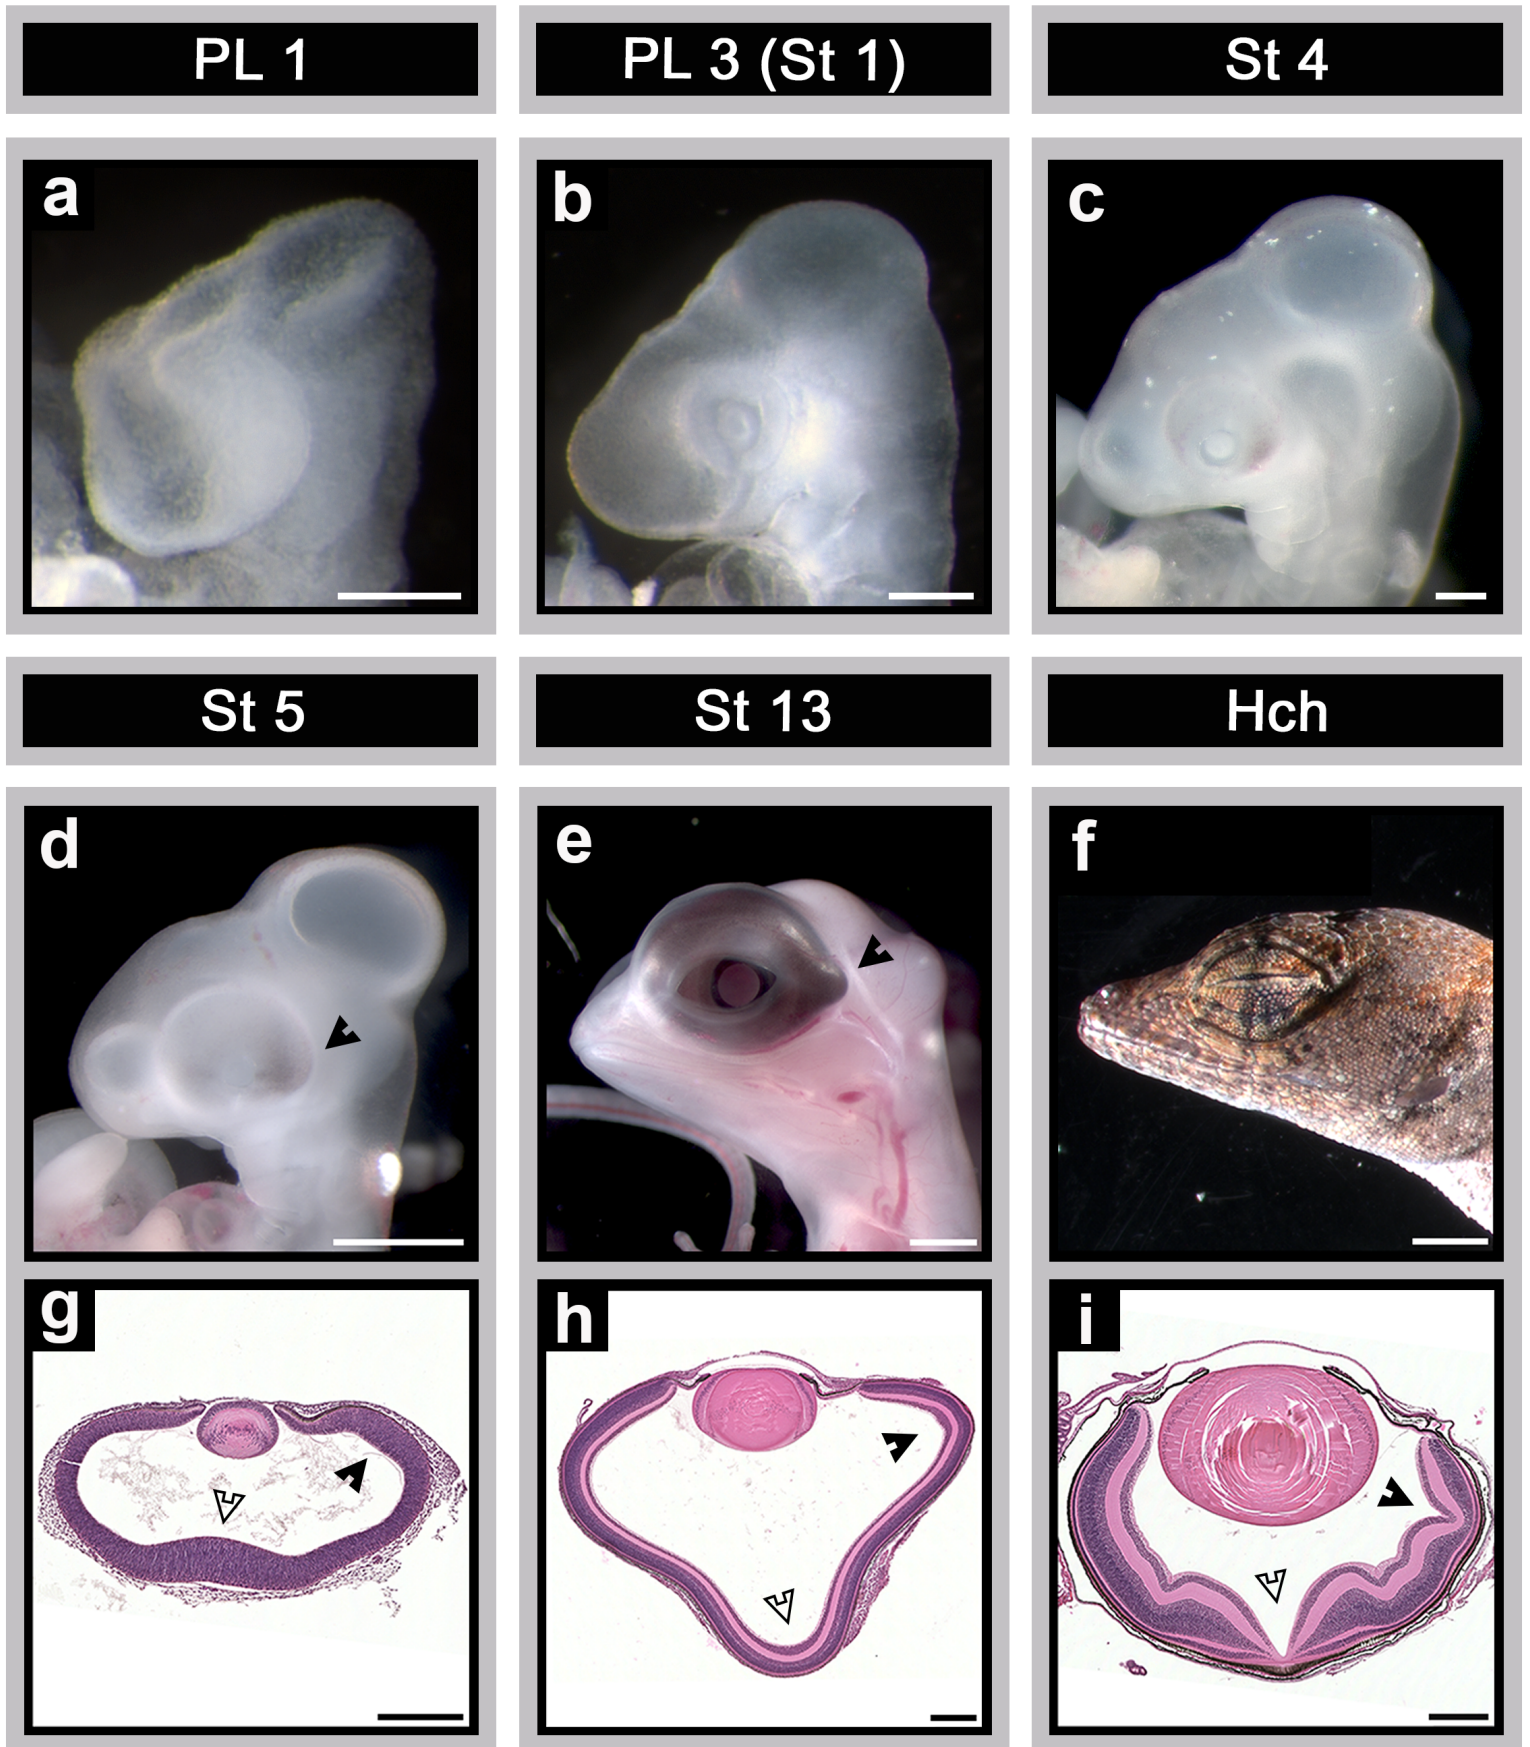

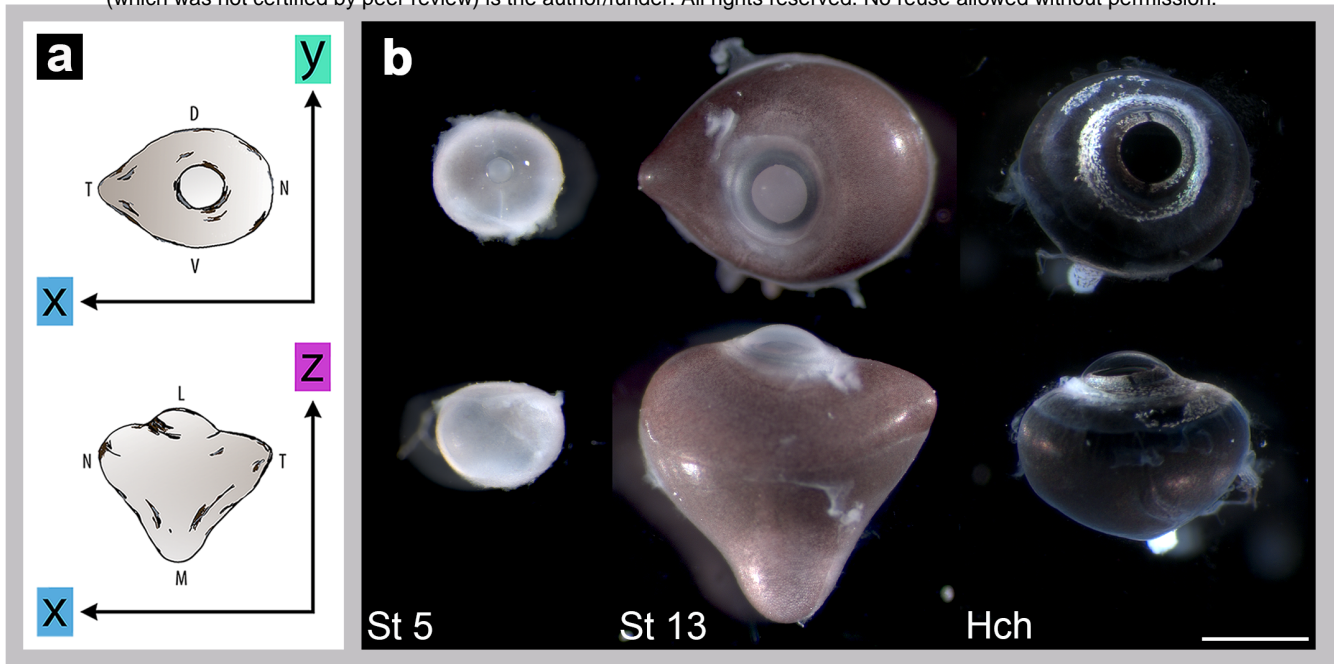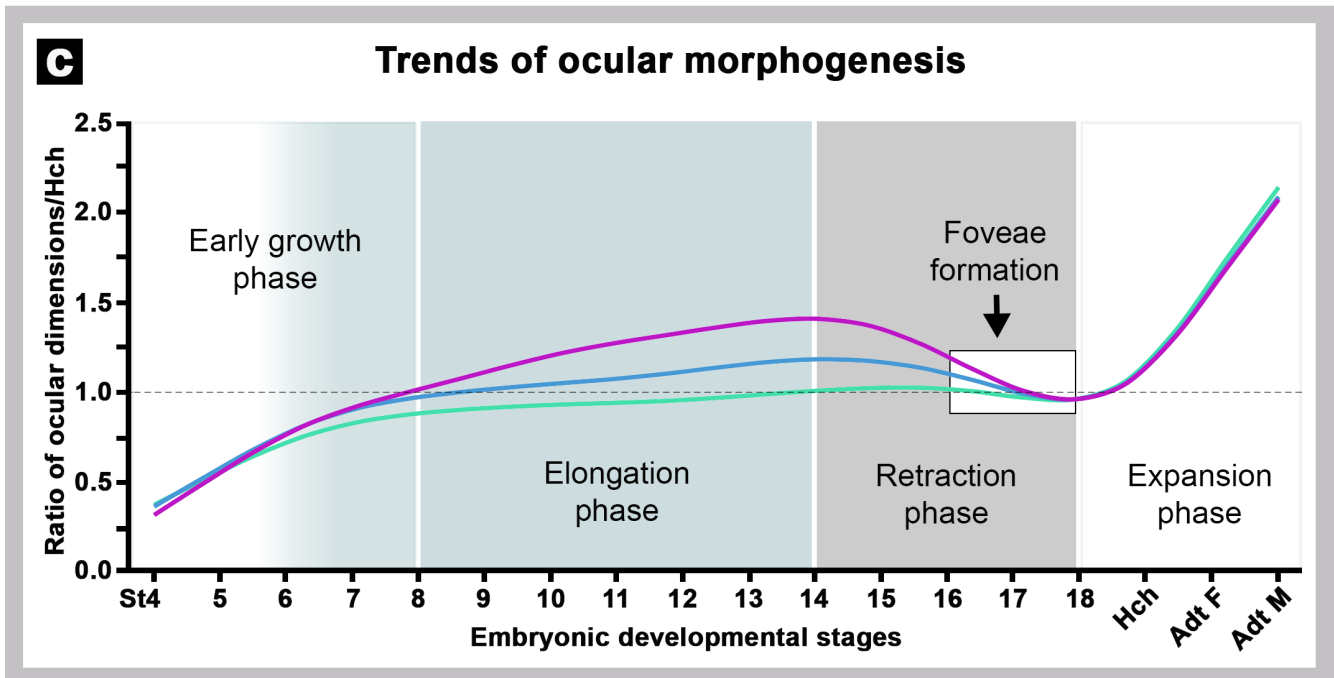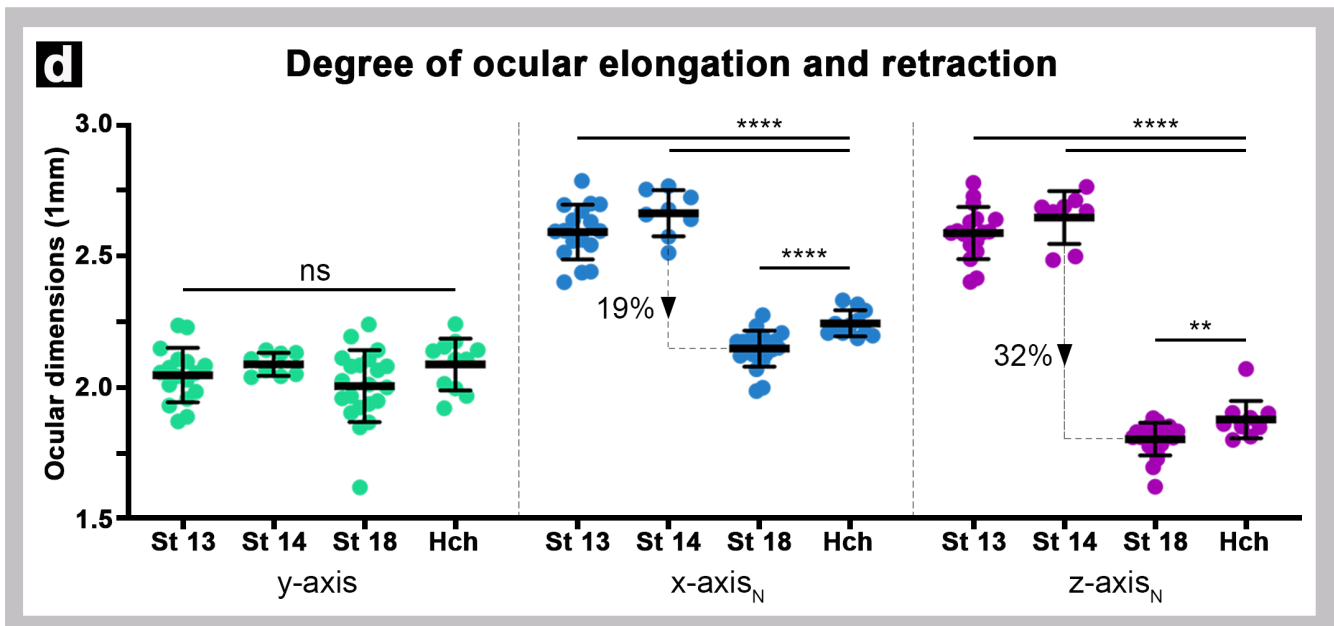



## Figure 5

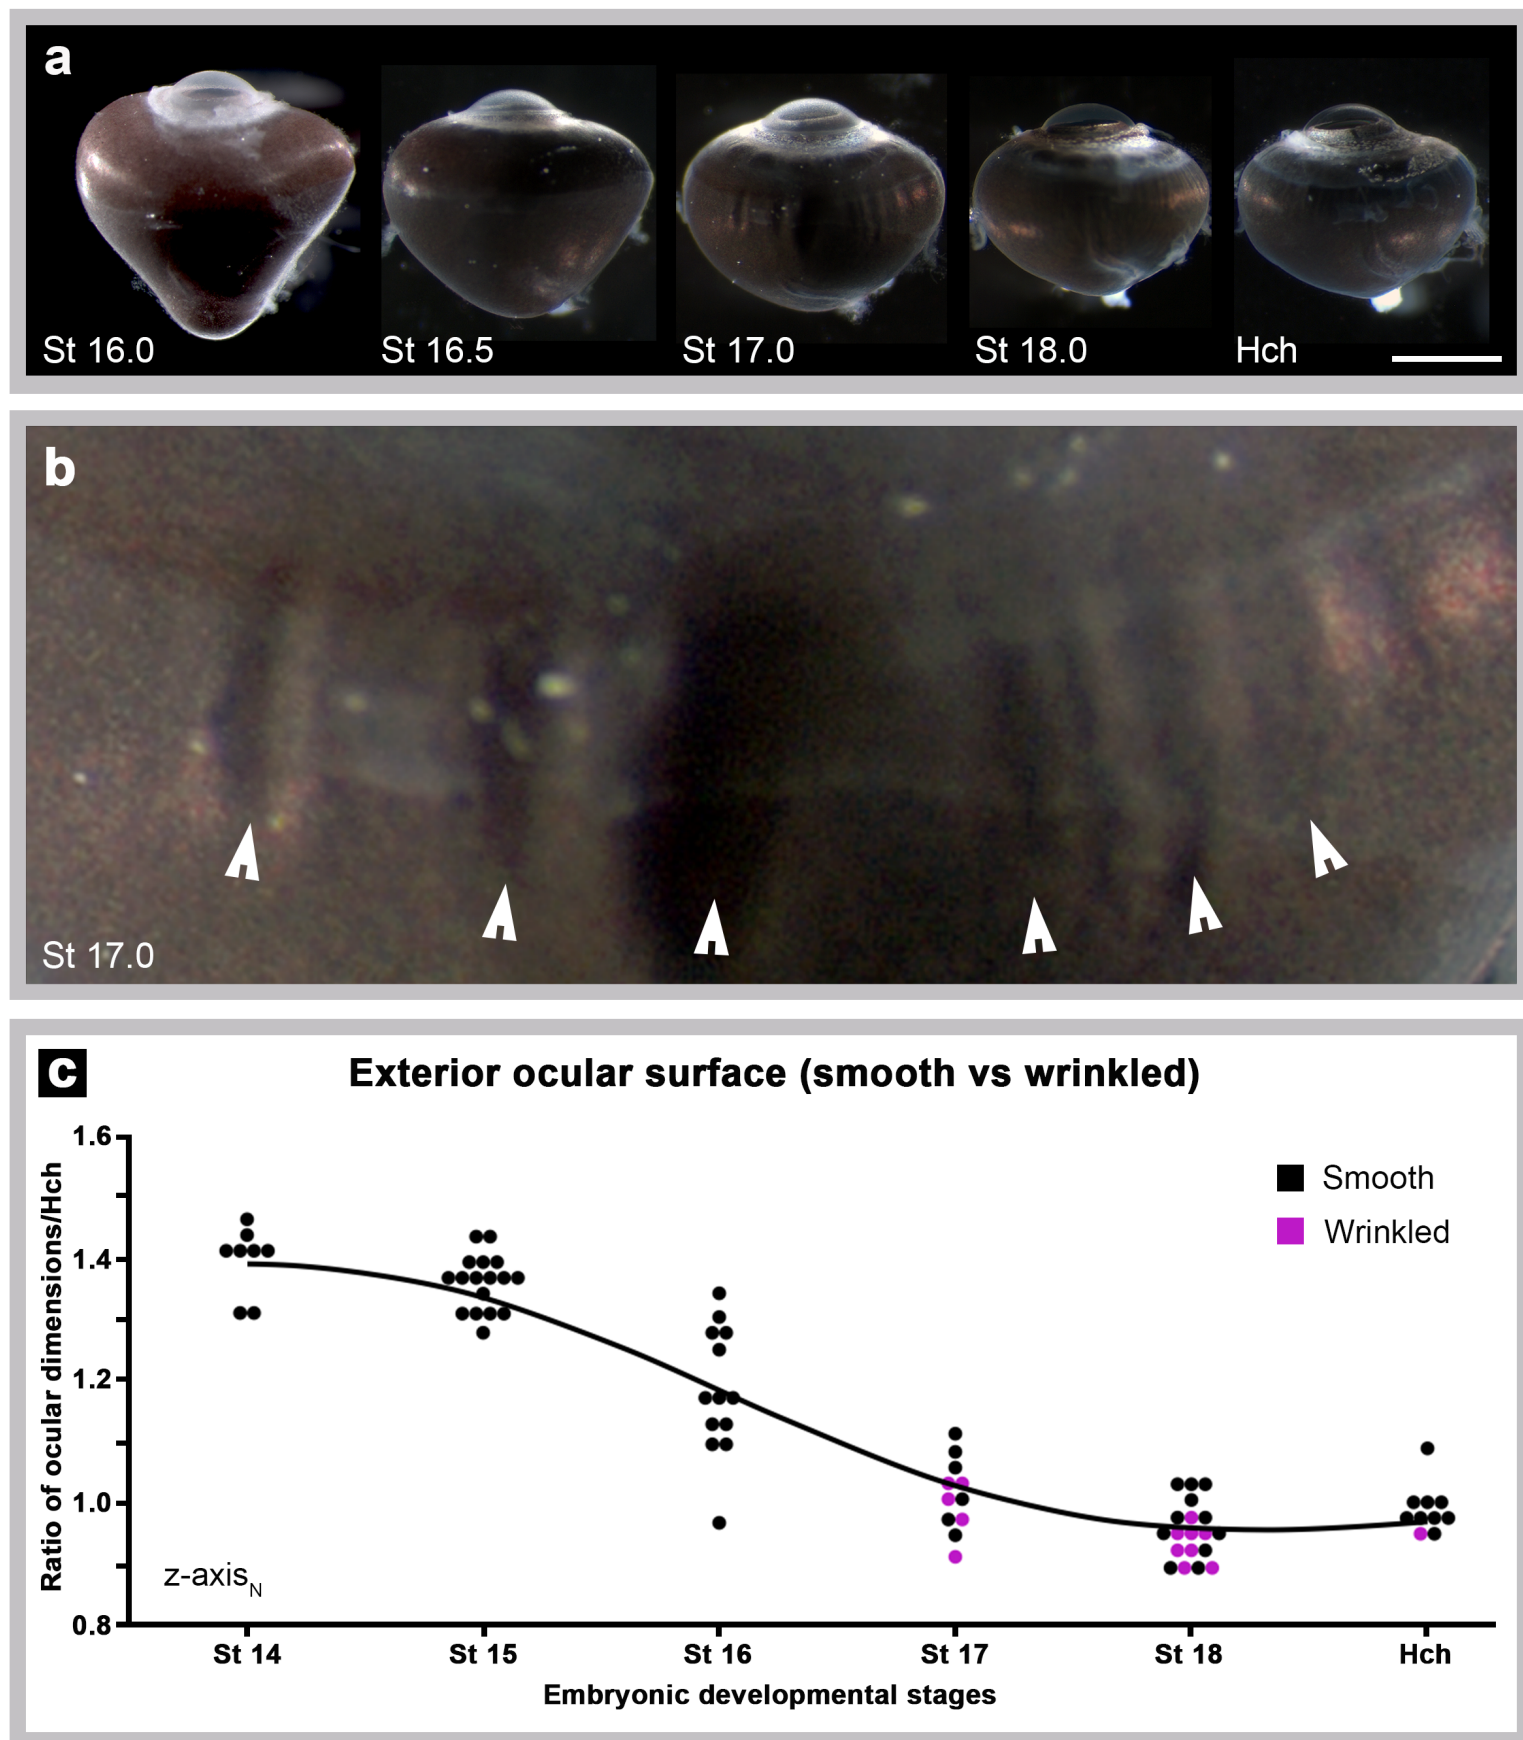

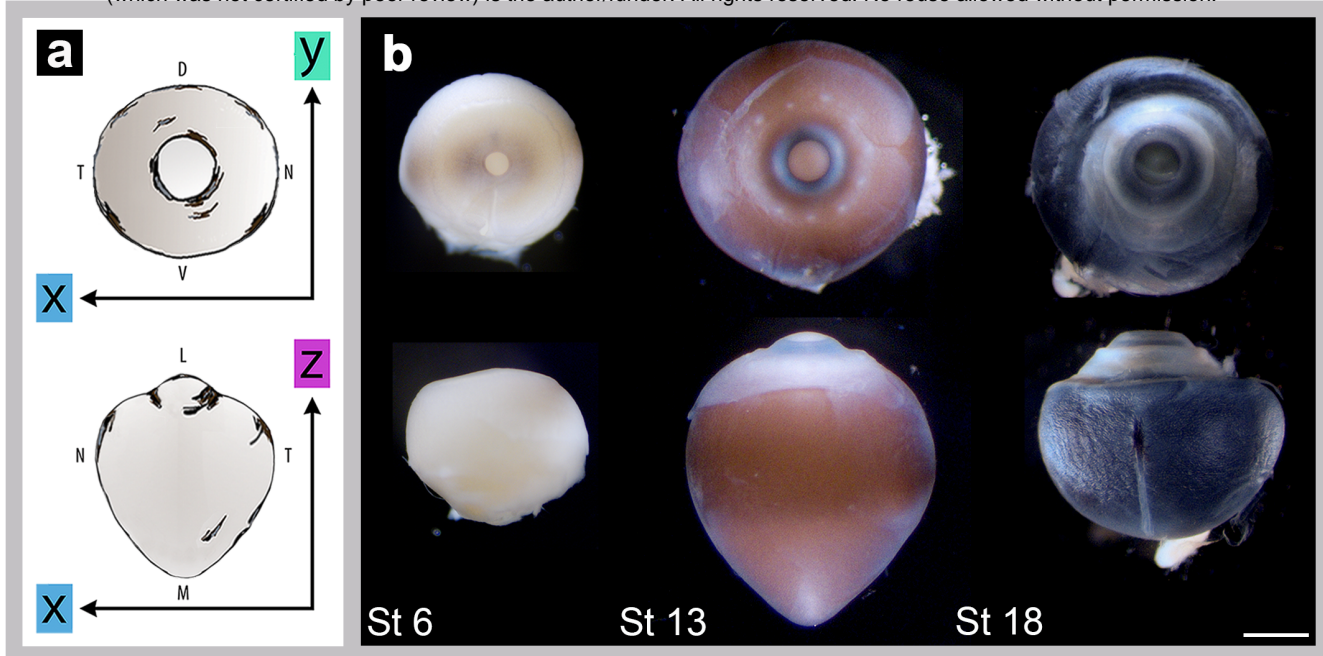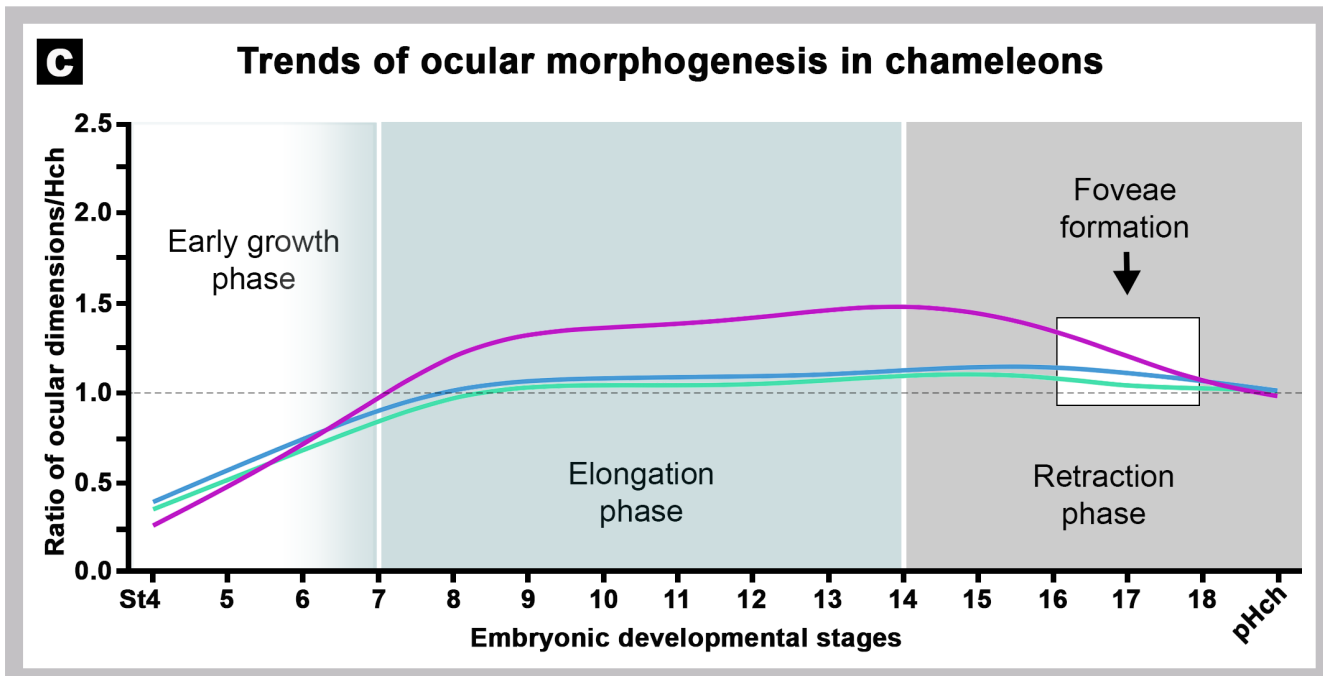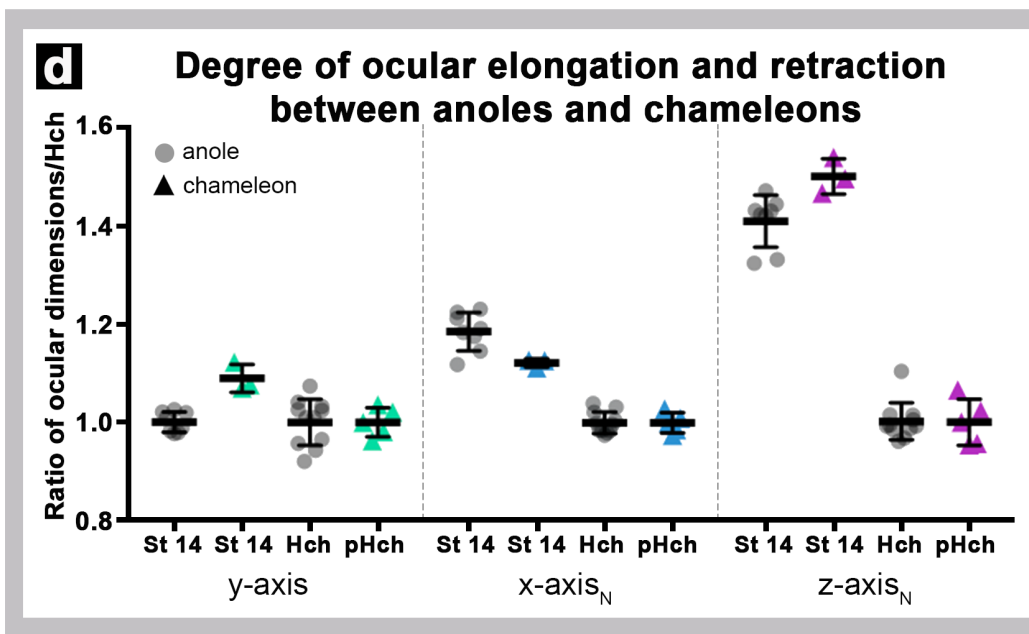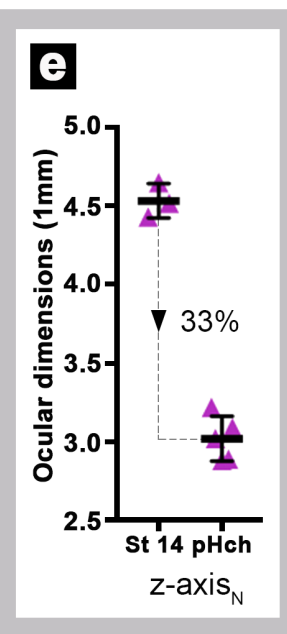

Source: https://biorxiv.org/content/10.1101/2021.01.20.427408v1.full.pdf
